# Supplementary material for: Evolution of full-length genomes of HBV quasispecies in sera of patients with a coexistence of HBsAg and anti-HBs antibodies
Source: PubMed Central journal article supplement (PMC5428874; doi:10.1038/s41598-017-00694-8), 2017-04-06
Supplement: 41598_2017_694_MOESM1_ESM.pdf [file 41598_2017_694_MOESM1_ESM.pdf]

**Evolution of full-length genomes of HBV quasispecies in sera of patients with a  
coexistence of HBsAg and anti-HBs antibodies**

Tai-Cheng Zhou<sup>1a</sup>, Xiao Li<sup>1a</sup>, Long Li<sup>1</sup>, Xiao-Fei Li<sup>2</sup>, Liang Zhang<sup>1\*</sup>, Jia Wei<sup>1\*</sup>

<sup>1</sup>Central lab, Liver disease research center, the second people's hospital of Yunnan  
Province, Kunming, Yunnan Province, China

<sup>2</sup>Clinical laboratory, the third people's hospital of Kunming City, Kunming, Yunnan  
Province, China

\*E-mail: Liang\_tkl@163.com

\*E-mail: weijia19631225@163.com

<sup>a</sup>These authors contributed equally to this work.

**Figure S1** Phylogenetic tree reconstructed for filtered sequences, which excluded sequences containing premature termination codons. This tree was used to calculate selective pressure. Phylogenetic trees were reconstructed from the concatenated four protein-coding nucleotide alignments excluding sequences with stop codon mutations, deletion and insertion frameshifts.

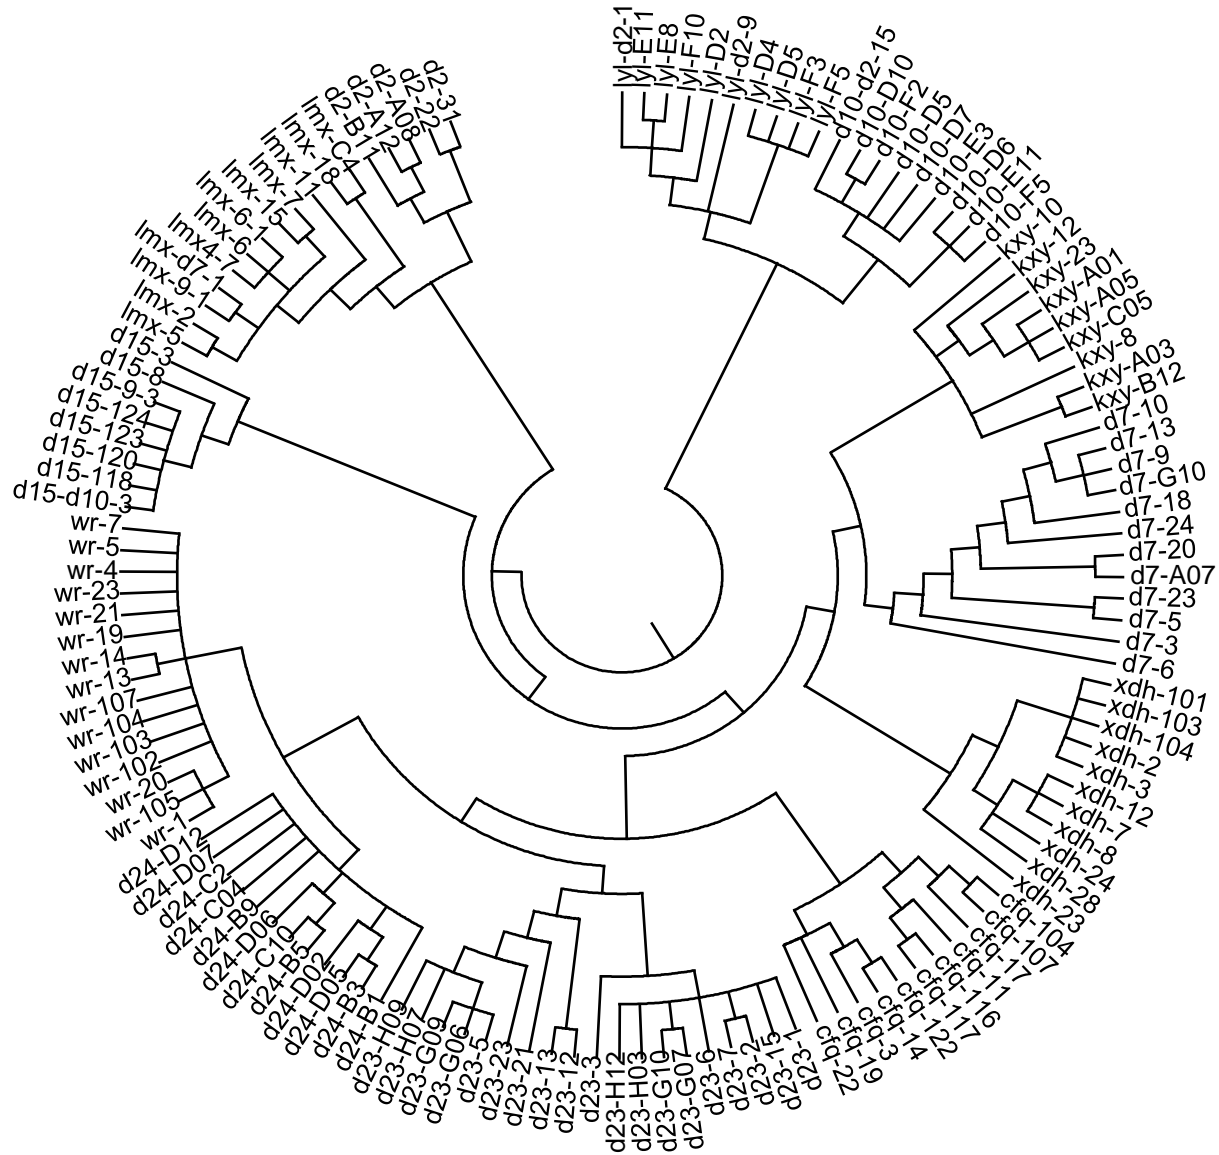

Table S1 Quasispecies complexity (Sn) of each nucleotide position (nt1 to 3215) between the patients with coexisting HBsAg and anti-HBs and controls.

| Region of variation<br>(level) | Experimental<br>group(mean±<br>SE)(n=6) | Control group (mean<br>±SE)(n=6) | P value* |
|--------------------------------|-----------------------------------------|----------------------------------|----------|
| <b>Genotype C</b>              |                                         |                                  |          |
| Full length (nt)               | 0.0362±0.0012                           | 0.0318±0.0013                    | 0.001    |
| Large HBsAg (nt)               | 0.0496±0.0027                           | 0.021±0.0021                     | <0.001   |
| Middle HBsAg (nt)              | 0.0343±0.003                            | 0.0163±0.0022                    | <0.001   |
| HBsAg (nt)                     | 0.0305±0.0033                           | 0.0137±0.0023                    | <0.001   |
| HBxAg (nt)                     | 0.0333±0.0023                           | 0.0251±0.0025                    | 0.002    |
| Procore/core(nt)               | 0.027±0.0017                            | 0.031±0.002                      | 0.058    |
| Polymerase (nt)                | 0.0474±0.0019                           | 0.0259±0.0017                    | <0.001   |
| RT region (nt)                 | 0.0365±0.0011                           | 0.0303±0.0011                    | 0.001    |
| <b>Genotype B/C/I</b>          |                                         |                                  |          |
| Full length (nt)               | 0.0484±0.0012                           | 0.0387±0.0013                    | <0.001   |
| Large HBsAg (nt)               | 0.0593±0.001                            | 0.0406±0.0009                    | <0.001   |
| Middle HBsAg (nt)              | 0.0588±0.0009                           | 0.0403±0.0008                    | <0.001   |
| HBsAg (nt)                     | 0.0581±0.0009                           | 0.0398±0.0008                    | <0.001   |
| HBxAg (nt)                     | 0.0578±0.0008                           | 0.0401±0.0008                    | <0.001   |
| Procore/core(nt)               | 0.0566±0.0009                           | 0.0412±0.0008                    | <0.001   |
| Polymerase (nt)                | 0.0551±0.001                            | 0.0405±0.001                     | <0.001   |
| RT region (nt)                 | 0.0566±0.0008                           | 0.0413±0.0008                    | <0.001   |

\*Paired-samples T test

**Table S2 Epitopes for HBxAg, LHBsAg, PreC/C and Polymerase.**

| Epitope ID | Linear sequence                                          | nt Starting Position | nt Ending Position | Antigen Name | Epitope types         |
|------------|----------------------------------------------------------|----------------------|--------------------|--------------|-----------------------|
| 34101      | VGAESCGRPFSGSLG                                          | 1434                 | 1478               | HBxAg        | HLAI T cell epitopes  |
| 37187      | KVLHKRTLGLSAMST                                          | 1644                 | 1688               | HBxAg        | HLAI T cell epitopes  |
| 36354      | CAFSSAGPCALRFTS                                          | 1554                 | 1598               | HBxAg        | HLAII T cell epitopes |
| 31898      | QLDPARDVL                                                | 1395                 | 1421               | HBxAg        | HLAI T cell epitopes  |
| 34027      | VLCLRPVGA                                                | 1416                 | 1442               | HBxAg        | HLAI T cell epitopes  |
| 36402      | LRFTSARRMETTVN                                           | 1584                 | 1625               | HBxAg        | HLAI T cell epitopes  |
| 37181      | TTVNAHOILPKVLHK                                          | 1614                 | 1658               | HBxAg        | HLAI T cell epitopes  |
| 37466      | KVLHKRTLGL                                               | 1644                 | 1673               | HBxAg        | HLAI T cell epitopes  |
| 37919      | VLHKRTLGL                                                | 1647                 | 1673               | HBxAg        | HLAI T cell epitopes  |
| 38701      | SAMSTTDLEAYFKDC                                          | 1674                 | 1718               | HBxAg        | HLAI T cell epitopes  |
| 40624      | EIRLMIFVLGGCRHK                                          | 1749                 | 1793               | HBxAg        | HLAI T cell epitopes  |
| 40664      | ETRLMIFVLGGCRHK                                          | 1749                 | 1793               | HBxAg        | HLAI T cell epitopes  |
| 28447      | MAARLCCQLDPARDV                                          | 1374                 | 1418               | HBxAg        | HLAII T cell epitopes |
| 34102      | SGSLGTLSSPSPSAV                                          | 1464                 | 1508               | HBxAg        | HLAII T cell epitopes |
| 37786      | KVLHKRTLGLSAMSTT                                         | 1644                 | 1691               | HBxAg        | HLAII T cell epitopes |
| 37943      | GLSAMSTTDL                                               | 1668                 | 1697               | HBxAg        | HLAII T cell epitopes |
| 39347      | YFKDCLFKDWEELGEE                                         | 1704                 | 1751               | HBxAg        | HLAII T cell epitopes |
| 39706      | CLFKDWEEL                                                | 1716                 | 1742               | HBxAg        | HLAII T cell epitopes |
| 41238      | VFVLGGCRHKLVCAAPC                                        | 1764                 | 1823               | HBxAg        | HLAII T cell epitopes |
| 42384      | VLGGCRHKL                                                | 1770                 | 1796               | HBxAg        | HLAII T cell epitopes |
| 42443      | KLVCSAPC                                                 | 1791                 | 1817               | HBxAg        | HLAII T cell epitopes |
| 35398      | HLSLRGLFV                                                | 1527                 | 1553               | HBxAg        | B cell epitopes       |
| 39089      | YFKDCLFKDWEELGE                                          | 1704                 | 1748               | HBxAg        | B cell epitopes       |
| 40283      | EELGEEIRLKVFLG                                           | 1734                 | 1778               | HBxAg        | B cell epitopes       |
| 41004      | VFVLGGCRHKLVCAAPC                                        | 1764                 | 1808               | HBxAg        | B cell epitopes       |
| 41238      | VFVLGGCRHKLVCAAPC                                        | 1764                 | 1823               | HBxAg        | B cell epitopes       |
| 42443      | KLVCSAPC                                                 | 1791                 | 1817               | HBxAg        | B cell epitopes       |
| 44684      | LVCAPAPCNFF TSA                                          | 1794                 | 1835               | HBxAg        | B cell epitopes       |
| 34103      | SPSAVPTDHGAHLSL                                          | 1494                 | 1538               | HBxAg        | B cell epitopes       |
| 2758       | FLGPLLVLOA                                               | 143                  | 172                | LHBsAg       | HLAI T cell epitopes  |
| 6556       | FLLTRILTI                                                | 176                  | 205                | LHBsAg       | HLAI T cell epitopes  |
| 6631       | FLLTRILTI                                                | 179                  | 205                | LHBsAg       | HLAI T cell epitopes  |
| 16755      | STGPCKTCTT                                               | 503                  | 532                | LHBsAg       | HLAI T cell epitopes  |
| 16795      | SMYPSCCCTK                                               | 515                  | 544                | LHBsAg       | HLAI T cell epitopes  |
| 16796      | CTTPAQGNSMFPSC                                           | 524                  | 565                | LHBsAg       | HLAI T cell epitopes  |
| 16836      | MFPSCCCT                                                 | 551                  | 574                | LHBsAg       | HLAI T cell epitopes  |
| 16857      | IPIPSSWAF                                                | 569                  | 595                | LHBsAg       | HLAI T cell epitopes  |
| 21139      | LWEWASVRF                                                | 605                  | 631                | LHBsAg       | HLAI T cell epitopes  |
| 21145      | SWLSLLVPF                                                | 632                  | 658                | LHBsAg       | HLAI T cell epitopes  |
| 21146      | YLWEWASVR                                                | 635                  | 661                | LHBsAg       | HLAI T cell epitopes  |
| 23151      | GLSPTVWLSV                                               | 674                  | 703                | LHBsAg       | HLAI T cell epitopes  |
| 24299      | PFMPLPIFF                                                | 752                  | 781                | LHBsAg       | HLAI T cell epitopes  |
| 423053     | TNLSVNPPLGFFPDHOLDP                                      | 2887                 | 2943               | LHBsAg       | HLAI T cell epitopes  |
| 423063     | PLGFFPDHQLDPAFGANSN<br>NPDWDFNP                          | 2908                 | 2988               | LHBsAg       | HLAI T cell epitopes  |
| 462003     | PTPFSPLRD                                                | 3160                 | 3189               | LHBsAg       | HLAI T cell epitopes  |
| 462107     | MQWNSTTFHQTLQDPRVR<br>GLYFPAGG                           | 3172                 | 34                 | LHBsAg       | HLAI T cell epitopes  |
| 462159     | NSTTFHQTLQDPRVRGLYF<br>PAGGSSSGTVNPVPTTVSPI<br>SSIFSRIGD | 3181                 | 109                | LHBsAg       | HLAI T cell epitopes  |
| 5911       | VLQAGFFLL                                                | 161                  | 187                | LHBsAg       | HLAII T cell epitopes |
| 5976       | AGFFLLTRILTI PQS                                         | 170                  | 214                | LHBsAg       | HLAII T cell epitopes |
| 7328       | GGTPACPG                                                 | 281                  | 304                | LHBsAg       | HLAII T cell epitopes |
| 11748      | GYRWMCLRR                                                | 365                  | 391                | LHBsAg       | HLAII T cell epitopes |
| 11997      | ILLLCLIFL                                                | 377                  | 403                | LHBsAg       | HLAII T cell epitopes |
| 12566      | ILLLCLIFLL                                               | 377                  | 406                | LHBsAg       | HLAII T cell epitopes |
| 15063      | LLDYQGMLPV                                               | 410                  | 439                | LHBsAg       | HLAII T cell epitopes |
| 22023      | LLVPFVQWFV                                               | 644                  | 673                | LHBsAg       | HLAII T cell epitopes |
| 22025      | LVPFVQWFVGLSPTV                                          | 647                  | 691                | LHBsAg       | HLAII T cell epitopes |
| 23991      | SVIWMMWYW                                                | 698                  | 724                | LHBsAg       | HLAII T cell epitopes |

|        |                      |      |      |           |                       |
|--------|----------------------|------|------|-----------|-----------------------|
| 1799   | SSGTVSPAQNTVSAISSI   | 71   | 124  | LHBsAg    | B cell epitopes       |
| 6632   | FLLTKILTI            | 212  | 238  | LHBsAg    | B cell epitopes       |
| 7332   | SOISSHSPTCCPPICPGYRW | 317  | 376  | LHBsAg    | B cell epitopes       |
| 11748  | GYRWMCLRR            | 365  | 391  | LHBsAg    | B cell epitopes       |
| 15061  | VIWMMWYWGR           | 386  | 415  | LHBsAg    | HLAI T cell epitopes  |
| 16814  | CTIPAQGTSVFPSCCCTKPS | 524  | 595  | LHBsAg    | HLAI T cell epitopes  |
|        | DGNC                 |      |      |           |                       |
| 16815  | CTIPAQGTSMFPSCCCTKPS | 524  | 595  | LHBsAg    | HLAI T cell epitopes  |
|        | DGNC                 |      |      |           |                       |
| 21242  | FLWEWASA             | 635  | 658  | LHBsAg    | HLAI T cell epitopes  |
| 18802  | CTKPTDGNC            | 569  | 595  | LHBsAg    | HLAII T cell epitopes |
| 5191   | TPARVTGGVF           | 151  | 180  | Polymeras | HLAI T cell epitopes  |
| 15879  | SGLPRYVARL           | 445  | 474  | Polymeras | HLAI T cell epitopes  |
| 16751  | GLSRYVARL            | 448  | 474  | Polymeras | HLAI T cell epitopes  |
| 16753  | GLSRYVARLS           | 448  | 477  | Polymeras | HLAI T cell epitopes  |
| 16832  | YIDDVVLGA            | 541  | 567  | Polymeras | HLAI T cell epitopes  |
| 16833  | YVDDVVLGA            | 541  | 567  | Polymeras | HLAI T cell epitopes  |
| 19351  | TYGRKLHLYSHPIILGFRKI | 577  | 636  | Polymeras | HLAI T cell epitopes  |
| 21070  | LHLYSHPIILGFRKI      | 592  | 636  | Polymeras | HLAI T cell epitopes  |
| 21116  | KLHLYSHPI            | 595  | 621  | Polymeras | HLAI T cell epitopes  |
| 24302  | FLLSLGIHL            | 808  | 834  | Polymeras | HLAI T cell epitopes  |
| 24943  | KOCFRKLPVNRPIDW      | 937  | 981  | Polymeras | HLAI T cell epitopes  |
| 27168  | YPALMPLSACIQAKR      | 1042 | 1086 | Polymeras | HLAI T cell epitopes  |
| 27169  | QAFTFSPTYK           | 1051 | 1080 | Polymeras | HLAI T cell epitopes  |
| 27285  | KQAFTFSPTYKAFLC      | 1081 | 1125 | Polymeras | HLAI T cell epitopes  |
| 27365  | LCOVFADATPTGWGL      | 1171 | 1215 | Polymeras | HLAI T cell epitopes  |
| 27878  | YMDDVVLGA            | 1283 | 1309 | Polymeras | HLAI T cell epitopes  |
| 32955  | ILRGTSFVYV           | 1402 | 1431 | Polymeras | HLAI T cell epitopes  |
| 34616  | SLYADSPSV            | 1498 | 1524 | Polymeras | HLAI T cell epitopes  |
| 226775 | NVSIPWTHK            | 2445 | 2471 | Polymeras | HLAI T cell epitopes  |
| 226786 | KVGNFTGLY            | 2469 | 2495 | Polymeras | HLAI T cell epitopes  |
| 226809 | GLYSSTVPV            | 2487 | 2513 | Polymeras | HLAI T cell epitopes  |
| 422990 | VGPLTVNEKRRLKLI      | 2592 | 2636 | Polymeras | HLAI T cell epitopes  |
| 422997 | RHYLHTLWKAGILYK      | 2739 | 2783 | Polymeras | HLAI T cell epitopes  |
| 423031 | HTLWKAGILYK          | 2751 | 2783 | Polymeras | HLAI T cell epitopes  |
| 423032 | TLWKAGILYK           | 2754 | 2783 | Polymeras | HLAI T cell epitopes  |
| 423036 | ESTRSASFCGSPYSW      | 2787 | 2831 | Polymeras | HLAI T cell epitopes  |
| 5191   | TPARVTGGVF           | 151  | 180  | Polymeras | HLAII T cell epitopes |
| 7171   | ESRLVVDFSQFSRGN      | 244  | 288  | Polymeras | HLAII T cell epitopes |
| 7230   | VVDFSQFSR            | 262  | 288  | Polymeras | HLAII T cell epitopes |
| 8608   | LQSLTNLLSSNLSWL      | 325  | 369  | Polymeras | HLAII T cell epitopes |
| 9815   | SSNLSWLSLDVSAAF      | 349  | 393  | Polymeras | HLAII T cell epitopes |
| 15848  | GVSRYVARL            | 415  | 441  | Polymeras | HLAII T cell epitopes |
| 15957  | GLPRYVARL            | 448  | 474  | Polymeras | HLAII T cell epitopes |
| 16833  | YVDDVVLGA            | 541  | 567  | Polymeras | HLAII T cell epitopes |
| 25650  | ALMPYACI             | 1015 | 1041 | Polymeras | HLAII T cell epitopes |
| 30373  | AANWILRGTSFVYVP      | 1390 | 1434 | Polymeras | HLAII T cell epitopes |
| 7161   | VDKNPHNTTESRLVV      | 217  | 261  | Polymeras | B cell epitopes       |
| 7162   | LVVDFSQFSR           | 220  | 249  | Polymeras | B cell epitopes       |
| 7171   | ESRLVVDFSQFSRGN      | 244  | 288  | Polymeras | B cell epitopes       |
| 23068  | SAICSVVRR            | 649  | 675  | Polymeras | B cell epitopes       |
| 51311  | GATVELLSFLPSDF       | 1928 | 1972 | PreC/C    | HLAI T cell epitopes  |
| 56814  | FLPSDFFPSI           | 1952 | 1981 | PreC/C    | HLAI T cell epitopes  |
| 59585  | PSDFFPSVRDLLDTA      | 1958 | 2002 | PreC/C    | HLAI T cell epitopes  |
| 59786  | SDFFPSVRDLLDTASALYR  | 1961 | 2020 | PreC/C    | HLAI T cell epitopes  |
| 61741  | LLDTASALY            | 1988 | 2014 | PreC/C    | HLAI T cell epitopes  |
| 62477  | YRDALESPEHCSPHHTA    | 2012 | 2062 | PreC/C    | HLAI T cell epitopes  |
| 62504  | ALESPEHCSPHHTALROAIL | 2021 | 2080 | PreC/C    | HLAI T cell epitopes  |
| 65148  | LESQDHCSL            | 2024 | 2050 | PreC/C    | HLAI T cell epitopes  |
| 65509  | PHHTALROAILCWGELMT   | 2048 | 2107 | PreC/C    | HLAI T cell epitopes  |
| 69398  | TWVGNTLEDPASRDVVS    | 2108 | 2167 | PreC/C    | HLAI T cell epitopes  |
| 69474  | WVGVNLEDPASRDVVS     | 2111 | 2170 | PreC/C    | HLAI T cell epitopes  |
| 69500  | VGSNLEDPASRELVVSYVN  | 2114 | 2170 | PreC/C    | HLAI T cell epitopes  |
| 69524  | GVNLEDPASRDL         | 2117 | 2152 | PreC/C    | HLAI T cell epitopes  |
| 71631  | TNLEDPASRDVVS        | 2120 | 2164 | PreC/C    | HLAI T cell epitopes  |

|        |                                            |      |      |        |                       |
|--------|--------------------------------------------|------|------|--------|-----------------------|
| 71847  | NLEDPASRD                                  | 2123 | 2152 | PreC/C | HLAI T cell epitopes  |
| 74180  | ASRDLVVSYVNTNMGLKF<br>RQLLWFHISCLTFGRETVIE | 2138 | 2254 | PreC/C | HLAI T cell epitopes  |
| 75040  | VVSYVNTNMGLKFRQL                           | 2153 | 2200 | PreC/C | HLAI T cell epitopes  |
| 76245  | YVNTNMGLK                                  | 2162 | 2188 | PreC/C | HLAI T cell epitopes  |
| 76370  | YVNVNMGLK                                  | 2162 | 2188 | PreC/C | HLAI T cell epitopes  |
| 79601  | LWFHISCLMF                                 | 2201 | 2230 | PreC/C | HLAI T cell epitopes  |
| 93224  | GRETVIEYLVSFVW                             | 2231 | 2275 | PreC/C | HLAI T cell epitopes  |
| 93431  | GRETVLEYLVSFVW                             | 2231 | 2275 | PreC/C | HLAI T cell epitopes  |
| 93536  | RETVIEYLVSF                                | 2234 | 2266 | PreC/C | HLAI T cell epitopes  |
| 110917 | VSGVWIRTPPA                                | 2258 | 2293 | PreC/C | HLAI T cell epitopes  |
| 178829 | VSGVWIRTPPAYRPPNAPI                        | 2258 | 2317 | PreC/C | HLAI T cell epitopes  |
| 187197 | LSTLPETTVVRRRGRSPRR<br>RTPSPR              | 2318 | 2392 | PreC/C | HLAI T cell epitopes  |
| 190409 | STLPETTVVRR                                | 2321 | 2353 | PreC/C | HLAI T cell epitopes  |
| 190443 | STLPETTVV                                  | 2321 | 2347 | PreC/C | HLAI T cell epitopes  |
| 190455 | STLPETTVVRRRGRSPRRR                        | 2321 | 2380 | PreC/C | HLAI T cell epitopes  |
| 190488 | TVVRRRGRSPRRRTP                            | 2339 | 2383 | PreC/C | HLAI T cell epitopes  |
| 190509 | TVVRRRGRSP                                 | 2339 | 2368 | PreC/C | HLAI T cell epitopes  |
| 190556 | RRRGRSPRRR                                 | 2348 | 2377 | PreC/C | HLAI T cell epitopes  |
| 190568 | RRRGRSPRRRTPSPRRRRS<br>QSPRRRRSQSRESQC     | 2348 | 2449 | PreC/C | HLAI T cell epitopes  |
| 190569 | GRSPRRRTPSPRRRRSQSPR<br>RRRSQSRESQC        | 2357 | 2449 | PreC/C | HLAI T cell epitopes  |
| 190577 | SPRRRTPSPRRRRSO                            | 2363 | 2407 | PreC/C | HLAI T cell epitopes  |
| 190589 | PSPRRRRS                                   | 2381 | 2404 | PreC/C | HLAI T cell epitopes  |
| 190596 | SPRRRRSOSPRRRRS                            | 2384 | 2428 | PreC/C | HLAI T cell epitopes  |
| 191095 | QSPRRRRSOSRESOC                            | 2405 | 2449 | PreC/C | HLAI T cell epitopes  |
| 47828  | MDIDPYKEFGATVELLSFL                        | 1901 | 1960 | PreC/C | HLAII T cell epitopes |
| 47829  | DIDPYKEFGATVELLSFLPS<br>DFFPSVRDLLDTASA    | 1904 | 2008 | PreC/C | HLAII T cell epitopes |
| 47830  | DIDPYKEFGATVELL                            | 1904 | 1948 | PreC/C | HLAII T cell epitopes |
| 47832  | IDPYKEFGATVELLS                            | 1907 | 1951 | PreC/C | HLAII T cell epitopes |
| 47833  | DPYKEFGATVELLSF                            | 1910 | 1954 | PreC/C | HLAII T cell epitopes |
| 47834  | PYKEFGATVELLSFL                            | 1913 | 1957 | PreC/C | HLAII T cell epitopes |
| 47836  | YKEFGATVELLSFLP                            | 1916 | 1960 | PreC/C | HLAII T cell epitopes |
| 48757  | KEFGASVELL                                 | 1919 | 1948 | PreC/C | HLAII T cell epitopes |
| 49308  | EFGATVELLSFLPSD                            | 1922 | 1966 | PreC/C | HLAII T cell epitopes |
| 50118  | FGATVELLSFLPSDF                            | 1925 | 1969 | PreC/C | HLAII T cell epitopes |
| 52404  | ATVELLSFLPSDFFPSV                          | 1931 | 1981 | PreC/C | HLAII T cell epitopes |
| 53382  | TVELLSFLPSDFFPS                            | 1934 | 1978 | PreC/C | HLAII T cell epitopes |
| 53383  | VELLSFLPSDFFPSV                            | 1937 | 1981 | PreC/C | HLAII T cell epitopes |
| 53394  | LLSFLPSDFFPSVRD                            | 1943 | 1987 | PreC/C | HLAII T cell epitopes |
| 58876  | LPSDFFPSV                                  | 1955 | 1981 | PreC/C | HLAII T cell epitopes |
| 60227  | FFPSIRDLL                                  | 1967 | 1993 | PreC/C | HLAII T cell epitopes |
| 60229  | FPSVRDLLDTASALYREAL<br>ESPEHCSPHHTA        | 1970 | 2062 | PreC/C | HLAII T cell epitopes |
| 61746  | LYREALESPEHCSPHHTAL                        | 2009 | 2074 | PreC/C | HLAII T cell epitopes |
| 65475  | PHHTALRQAI                                 | 2048 | 2077 | PreC/C | HLAII T cell epitopes |
| 67204  | LCWGELMTLATWVGVN<br>EDPASRD                | 2078 | 2152 | PreC/C | HLAII T cell epitopes |
| 67300  | LCWGELMTLATWVGVN                           | 2078 | 2128 | PreC/C | HLAII T cell epitopes |
| 68276  | VCWGELMNL                                  | 2078 | 2104 | PreC/C | HLAII T cell epitopes |
| 68599  | CWGELMTLATWVGVNLE                          | 2081 | 2155 | PreC/C | HLAII T cell epitopes |
| 70928  | VNLEDPASRD                                 | 2120 | 2152 | PreC/C | HLAII T cell epitopes |
| 70929  | VNLEDPASRDLVVSYVNT                         | 2120 | 2200 | PreC/C | HLAII T cell epitopes |
| 71847  | NLEDPASRD                                  | 2123 | 2152 | PreC/C | HLAII T cell epitopes |
| 73842  | PHHTALRQAILCWGD                            | 2135 | 2179 | PreC/C | HLAII T cell epitopes |
| 73843  | PHHTALRQAILCWGDLMN                         | 2135 | 2194 | PreC/C | HLAII T cell epitopes |
| 75585  | VSYVNTNMGLKFRQL                            | 2156 | 2200 | PreC/C | HLAII T cell epitopes |
| 93536  | RETVIEYLVSF                                | 2234 | 2266 | PreC/C | HLAII T cell epitopes |
| 48337  | KEFGATVELLSFLPS                            | 1919 | 1963 | PreC/C | B cell epitopes       |
| 55712  | FLPADFFPSV                                 | 1952 | 1981 | PreC/C | B cell epitopes       |

|        |                       |      |      |        |                       |
|--------|-----------------------|------|------|--------|-----------------------|
| 55713  | FLPSDFFPSV            | 1952 | 1981 | PreC/C | B cell epitopes       |
| 60249  | RDLLDTAAALYRDALESPE   | 1982 | 2041 | PreC/C | B cell epitopes       |
| 61746  | LYREALESPHCSPHHTAL    | 2009 | 2074 | PreC/C | B cell epitopes       |
| 65360  | HHHTALROAILCWGELMN    | 2048 | 2107 | PreC/C | B cell epitopes       |
| 68600  | CWGDMLTLATWVGTNLE     | 2081 | 2140 | PreC/C | B cell epitopes       |
| 68618  | GELMTLATW             | 2087 | 2113 | PreC/C | B cell epitopes       |
| 71938  | LEDPASRDLVVSY         | 2126 | 2164 | PreC/C | B cell epitopes       |
| 72649  | LEDPASRDLVVSYV        | 2126 | 2167 | PreC/C | B cell epitopes       |
| 73843  | PHHTALRQAILCWGDLMN    | 2135 | 2194 | PreC/C | B cell epitopes       |
| 75662  | SYVNTNMGLKFRQLLWFH    | 2159 | 2254 | PreC/C | B cell epitopes       |
|        | ISCLTFGRETVIEWY       |      |      |        |                       |
| 79531  | NVNMGLKIRO            | 2168 | 2197 | PreC/C | B cell epitopes       |
| 79549  | KFROLLWFHISCLTFGRET   | 2186 | 2254 | PreC/C | B cell epitopes       |
| 79577  | LLWFHISCLTFGRETVIEWY  | 2198 | 2257 | PreC/C | B cell epitopes       |
| 79583  | LWFHISCLTFGRETVIEWYLV | 2201 | 2260 | PreC/C | B cell epitopes       |
| 79594  | LWFHISCLTF            | 2201 | 2230 | PreC/C | B cell epitopes       |
| 79613  | HISCLTFGR             | 2210 | 2236 | PreC/C | B cell epitopes       |
| 79654  | CLTFGRETIV            | 2219 | 2245 | PreC/C | B cell epitopes       |
| 79672  | CLTFGRETVIEWY         | 2219 | 2254 | PreC/C | B cell epitopes       |
| 79673  | LTFGRETVIEWYLVSF      | 2222 | 2266 | PreC/C | B cell epitopes       |
| 96088  | VLEYLVSFV             | 2243 | 2272 | PreC/C | B cell epitopes       |
| 96630  | EYLVSFVWIRTPPA        | 2249 | 2293 | PreC/C | B cell epitopes       |
| 96862  | EYLVSFVW              | 2249 | 2275 | PreC/C | B cell epitopes       |
| 97104  | LVSFVWIR              | 2255 | 2281 | PreC/C | B cell epitopes       |
| 180906 | SFVWIRTPPAYRPPNAPIL   | 2261 | 2320 | PreC/C | B cell epitopes       |
| 180913 | FGVWIRTPPAYR          | 2264 | 2299 | PreC/C | B cell epitopes       |
| 180914 | VWIRTPPAYR            | 2270 | 2299 | PreC/C | B cell epitopes       |
| 180915 | WIRTPPAYR             | 2273 | 2299 | PreC/C | B cell epitopes       |
| 180916 | IRTPPAYRPPNAPILSTLPET | 2276 | 2344 | PreC/C | B cell epitopes       |
| 180917 | IRTPPAYRPPNAPILSTLPET | 2276 | 2338 | PreC/C | B cell epitopes       |
| 180928 | PAYRPPNAPIL           | 2288 | 2320 | PreC/C | B cell epitopes       |
| 180929 | AYRPPNAPILSTLPE       | 2291 | 2335 | PreC/C | B cell epitopes       |
| 180930 | YRPPNAPILSTLPETT      | 2294 | 2341 | PreC/C | B cell epitopes       |
| 56900  | FLPPDFFPSV            | 1952 | 1981 | PreC/C | HLAII T cell epitopes |
| 56900  | FLPPDFFPSV            | 1952 | 1981 | PreC/C | B cell epitopes       |
| 46480  | ISCSCPTVQASKLCLGWLW   | 1841 | 1906 | PreC/C | HLAI T cell epitopes  |
|        | GMD                   |      |      |        |                       |
| 50253  | FGATVELLSFLPSDFFPSV   | 1925 | 1981 | PreC/C | HLAI T cell epitopes  |
| 58122  | FLPADFFPSI            | 1952 | 1981 | PreC/C | HLAI T cell epitopes  |
| 61745  | PHHTALRQAIVCWGELMT    | 1997 | 2056 | PreC/C | HLAI T cell epitopes  |
| 69715  | GGNLEDPISRDLVVSYVNT   | 2117 | 2173 | PreC/C | HLAI T cell epitopes  |
| 190466 | STLPETTIVVRQ          | 2321 | 2353 | PreC/C | HLAI T cell epitopes  |
| 46927  | SCPTVQASKLCLGWLWG     | 1850 | 1900 | PreC/C | HLAII T cell epitopes |
| 47826  | SKLCLGWLWMD           | 1871 | 1906 | PreC/C | HLAII T cell epitopes |
| 47827  | LGWLWMDIDIPYKEF       | 1883 | 1927 | PreC/C | HLAII T cell epitopes |
| 57129  | FLPVDFPSV             | 1952 | 1981 | PreC/C | HLAII T cell epitopes |
| 66988  | PHHTALRQAILCWGDLMN    | 2048 | 2107 | PreC/C | HLAII T cell epitopes |
| 67096  | PHHTALRQAILCWGELMN    | 2048 | 2107 | PreC/C | HLAII T cell epitopes |
| 67203  | PHHTALROAVLCWGELMT    | 2048 | 2107 | PreC/C | HLAII T cell epitopes |
| 74445  | RDLVVSYVNTNVGLKFRQ    | 2144 | 2203 | PreC/C | HLAII T cell epitopes |
| 46013  | MQLFHLCLIISCTCPTVQAS  | 1814 | 1873 | PreC/C | B cell epitopes       |
| 46927  | SCPTVQASKLCLGWLWG     | 1850 | 1900 | PreC/C | B cell epitopes       |
| 57784  | FLPNDFPSV             | 1952 | 1981 | PreC/C | B cell epitopes       |
| 66895  | PHHTALRQAILCWGDLMN    | 2048 | 2107 | PreC/C | B cell epitopes       |
| 79521  | VNTNMGLKFRQLLWFHIS    | 2165 | 2221 | PreC/C | B cell epitopes       |
| 79546  | TNVGLKFRQLLWFHISCLT   | 2171 | 2230 | PreC/C | B cell epitopes       |
| 79561  | FRQLLWFHISCLTFGRETVI  | 2189 | 2257 | PreC/C | B cell epitopes       |
| 79609  | FHISCLTFGRETVIEWYLVSF | 2207 | 2269 | PreC/C | B cell epitopes       |
| 79677  | TFGRETVIEWYLVSFVWIR   | 2225 | 2281 | PreC/C | B cell epitopes       |
| 180919 | PPAYRPPNAPILSTL       | 2285 | 2329 | PreC/C | B cell epitopes       |
| 180931 | ILSTLPETTIV           | 2315 | 2344 | PreC/C | B cell epitopes       |
| 58234  | FLPSDFLPSV            | 1952 | 1981 | PreC/C | B cell epitopes       |

note: LHBsAg, large HBsAg; PreC/C, precore/core.

**Table S3 dN/dS ratios of genome, pol, HbxAg, PreC/C and LHBsAg.**

| Groups       | Patients |          | dN/dS    |          |          |          |
|--------------|----------|----------|----------|----------|----------|----------|
|              | No       | Genome   | Pol      | HBxAg    | PreC/C   | LHBsAg   |
| Experimental | d10      | 0.7288   | 0.626    | 0.0001   | 0.0001   | 425.2716 |
| Experimental | d10      | 0.4379   | 0.0001   | 0.364    | 0.0001   | 339.4327 |
| Experimental | d10      | 0.0001   | 10.397   | 0.3556   | 0.0001   | 0.0001   |
| Experimental | d10      | 0.6569   | 999      | 0.3625   | 0.0001   | 0.4561   |
| Experimental | d10      | 0.8765   | 1.2549   | 0.0001   | 0.0001   | 339.6112 |
| Experimental | d10      | 2.6121   | 1.2346   | 999      | 0.0001   | 7.0964   |
| Experimental | d10      | 0.0001   | 8.3203   | 0.3084   | 0.0001   | 0.0001   |
| Experimental | d10      | 0.0001   | 6.6045   | 0.3107   | 0.0001   | 0.0001   |
| Experimental | d10      | 1.3149   | 0.4171   | 0.3064   | 870.3481 | 425.6478 |
| Experimental | d15      | 0.0001   | 8.4696   | 0.3116   | 0.0508   | 0.0001   |
| Experimental | d15      | 0.0001   | 8.5683   | 0.3166   | 0.1047   | 0.0001   |
| Experimental | d15      | 0.0001   | 12.9322  | 0.3128   | 0.0852   | 0.0001   |
| Experimental | d15      | 0.0001   | 7.7717   | 0.3148   | 0.251    | 0.0001   |
| Experimental | d15      | 0.0001   | 7.5559   | 0.3152   | 0.037    | 0.0001   |
| Experimental | d15      | 0.0001   | 9.2665   | 0.3115   | 0.0881   | 0.0001   |
| Experimental | d15      | 1.0444   | 0.5089   | 0.3182   | 0.56     | 487.2994 |
| Experimental | d15      | 0.6654   | 0.3098   | 1.3778   | 0.0001   | 6.6585   |
| Experimental | d2       | 0.4333   | 0.1648   | 993.5894 | 0.0761   | 422.4457 |
| Experimental | d2       | 0.0001   | 6.7914   | 0.3008   | 0.0629   | 0.0001   |
| Experimental | d2       | 173.0408 | 13.7259  | 0.3091   | 875.8592 | 0.0001   |
| Experimental | d2       | 1.311    | 999      | 0.0001   | 0.0804   | 338.4502 |
| Experimental | d2       | 0.8708   | 0.8308   | 0.4575   | 0.8376   | 337.7533 |
| Experimental | d23      | 1.0202   | 0.4146   | 999      | 0.0001   | 485.2943 |
| Experimental | d23      | 0.0001   | 0.0001   | 0.3429   | 0.1028   | 0.0001   |
| Experimental | d23      | 0.0001   | 0.0001   | 0.3377   | 0.0001   | 0.0001   |
| Experimental | d23      | 0.0001   | 0.0001   | 0.3398   | 0.0001   | 0.0001   |
| Experimental | d23      | 326.9184 | 999      | 996.5506 | 873.0142 | 425.0353 |
| Experimental | d23      | 0.0001   | 0.0001   | 0.3262   | 0.1159   | 0.2285   |
| Experimental | d23      | 0.0001   | 0.0001   | 0.334    | 0.0988   | 0.0001   |
| Experimental | d23      | 2.1868   | 999      | 998.535  | 0.0001   | 0.919    |
| Experimental | d23      | 0.2621   | 0.2766   | 0.3364   | 0.0695   | 534.7221 |
| Experimental | d23      | 0.1456   | 0.1382   | 0.3455   | 0.0001   | 1.3785   |
| Experimental | d23      | 0.6567   | 999      | 0.3234   | 0.1025   | 0.0001   |
| Experimental | d23      | 1.4605   | 2.5031   | 0.3355   | 0.1036   | 0.4591   |
| Experimental | d23      | 390.536  | 999      | 999      | 0.0001   | 0.0001   |
| Experimental | d23      | 0.4367   | 0.4142   | 0.4589   | 0.4184   | 0.0001   |
| Experimental | d23      | 0.4382   | 999      | 0.3225   | 0.0436   | 486.5935 |
| Experimental | d23      | 1.1705   | 2.0873   | 997.9338 | 0.1262   | 0.2285   |
| Experimental | d23      | 0.6578   | 0.8339   | 999      | 0.1243   | 425.1518 |
| Experimental | d23      | 1.3162   | 0.8345   | 999      | 0.0631   | 0.0001   |
| Experimental | d23      | 2.6322   | 0.833    | 998.6699 | 0.1581   | 0.0001   |
| Experimental | d24      | 1.7552   | 0.4175   | 0.3134   | 863.7041 | 426.0316 |
| Experimental | d24      | 222.284  | 811.4317 | 0.3112   | 0.0001   | 340.8202 |
| Experimental | d24      | 0.0001   | 0.0001   | 0.3101   | 999      | 0.0001   |
| Experimental | d24      | 257.6399 | 1.2483   | 0.3188   | 0.0001   | 0.0001   |
| Experimental | d24      | 0.0001   | 1.6619   | 0.3423   | 0.0001   | 0.0001   |
| Experimental | d24      | 0.0001   | 1.6666   | 0.3422   | 0.0001   | 0.0001   |
| Experimental | d24      | 0.0001   | 0.0001   | 0.3409   | 0.0001   | 0.0001   |
| Experimental | d24      | 0.7311   | 999      | 0.0001   | 864.7285 | 0.0001   |
| Experimental | d24      | 0.5847   | 0.2778   | 0.3148   | 0.0001   | 426.2213 |
| Experimental | d24      | 0.6577   | 1.2522   | 0.3094   | 0.0001   | 0.0001   |
| Experimental | d24      | 222.2845 | 810.7659 | 0.3096   | 0.0001   | 340.517  |
| Experimental | d24      | 1.7548   | 999      | 0.0001   | 0.0001   | 426.133  |
| Experimental | d7       | 0.5235   | 0.8238   | 0.0001   | 0.1395   | 0.4602   |
| Experimental | d7       | 0.4365   | 999      | 0.3128   | 0.0001   | 0.0001   |
| Experimental | d7       | 0.3491   | 0.412    | 0.4584   | 0.1132   | 0.0001   |
| Experimental | d7       | 2.183    | 999      | 0.3186   | 0.0743   | 0.4605   |
| Experimental | d7       | 0.727    | 2.4769   | 0.0001   | 0.1043   | 0.0001   |
| Experimental | d7       | 0.6011   | 0.2064   | 0.3478   | 0.4192   | 426.4093 |
| Experimental | d7       | 0.421    | 0.2742   | 998.3971 | 876.5726 | 0.0001   |
| Experimental | d7       | 1.32     | 999      | 0.3087   | 0.4189   | 0.0001   |
| Experimental | d7       | 0.5222   | 0.5776   | 994.8217 | 0.1476   | 0.3643   |
| Experimental | d7       | 0.6957   | 0.6855   | 999      | 0.174    | 0.6879   |
| Experimental | d7       | 1.7474   | 1.0988   | 0.2276   | 0.1035   | 3.2281   |
| Experimental | d7       | 1.0763   | 0.5464   | 0.0001   | 999      | 1.373    |
| Control      | cfq      | 0.0001   | 6.9379   | 0.3282   | 0.103    | 0.0001   |
| Control      | cfq      | 0.0001   | 4.5017   | 0.3377   | 0.1054   | 0.0001   |
| Control      | cfq      | 0.2186   | 0.0001   | 0.2266   | 0.1177   | 0.0001   |
| Control      | cfq      | 0.3282   | 0.416    | 0.0001   | 876.1373 | 0.0001   |



|         |     |          |          |          |          |          |
|---------|-----|----------|----------|----------|----------|----------|
| Control | cfq | 0.4041   | 0.1039   | 0.0001   | 989.1077 | 425.7829 |
| Control | cfq | 0.7662   | 0.4162   | 996.2854 | 0.6405   | 0.0001   |
| Control | cfq | 1.1697   | 0.6955   | 0.2577   | 0.0501   | 486.1918 |
| Control | cfq | 0.3749   | 0.4161   | 0.0001   | 878.2697 | 0.9184   |
| Control | cfq | 1.3152   | 0.4165   | 998.2267 | 874.4811 | 0.0001   |
| Control | cfq | 1.7562   | 0.6939   | 999      | 876.5491 | 534.0365 |
| Control | cfq | 307.1197 | 999      | 0.3384   | 877.5599 | 340.1642 |
| Control | kxy | 1.3118   | 999      | 0.4597   | 0.193    | 0.0001   |
| Control | kxy | 0.8742   | 0.4123   | 999      | 0.1961   | 1.8528   |
| Control | kxy | 2.1902   | 999      | 0.3602   | 883.6503 | 0.4607   |
| Control | kxy | 0.0001   | 0.0001   | 0.34     | 0.2523   | 0.0001   |
| Control | kxy | 0.0001   | 0.0001   | 0.3442   | 0.2292   | 0.0001   |
| Control | kxy | 0.0001   | 0.0001   | 0.3417   | 0.2784   | 0.0001   |
| Control | kxy | 1.6052   | 999      | 0.3545   | 0.2127   | 1.3859   |
| Control | kxy | 0.0001   | 0.0001   | 0.3629   | 0.087    | 0.0001   |
| Control | kxy | 0.0001   | 0.0001   | 0.3554   | 0.1593   | 0.0001   |
| Control | lmx | 0.0001   | 0.0001   | 0.3228   | 0.1875   | 0.0001   |
| Control | lmx | 1.0912   | 1.0428   | 0.3289   | 0.1575   | 0.0001   |
| Control | lmx | 172.3826 | 0.0001   | 0.3485   | 877.8005 | 0.0001   |
| Control | lmx | 0.0001   | 17.8258  | 0.3541   | 0.0248   | 0.0001   |
| Control | lmx | 0.0001   | 0.0001   | 0.3325   | 0.1897   | 0.0001   |
| Control | lmx | 0.0001   | 0.0001   | 0.3426   | 0.1399   | 0.0001   |
| Control | lmx | 0.0001   | 11.1316  | 0.3445   | 0.1584   | 0.0001   |
| Control | lmx | 0.0001   | 0.0001   | 0.3102   | 0.1132   | 0.0001   |
| Control | lmx | 0.0001   | 0.0001   | 0.3129   | 0.1647   | 0.0001   |
| Control | lmx | 254.1254 | 999      | 0.3431   | 0.1722   | 338.2032 |
| Control | lmx | 1.3088   | 0.0001   | 998.3381 | 999      | 338.7426 |
| Control | lmx | 0.2175   | 807.6278 | 0.0001   | 0.0001   | 0.0001   |
| Control | lyl | 256.147  | 999      | 0.4189   | 0.0001   | 339.2307 |
| Control | lyl | 0.0001   | 0.0001   | 0.4199   | 0.0001   | 0.0001   |
| Control | lyl | 0.4367   | 0.0001   | 0.4136   | 0.0001   | 0.0001   |
| Control | lyl | 0.6548   | 807.5884 | 999      | 0.0001   | 0.2263   |
| Control | lyl | 0.3734   | 2.0821   | 0.4096   | 0.0001   | 0.4529   |
| Control | lyl | 0.2181   | 999      | 0.4015   | 0.0001   | 338.6178 |
| Control | lyl | 0.0001   | 9.8987   | 0.4018   | 0.0001   | 0.0001   |
| Control | lyl | 0.0001   | 13.9145  | 0.4097   | 0.0001   | 0.0001   |
| Control | lyl | 1.3103   | 0.4169   | 0.4047   | 0.1082   | 423.5669 |
| Control | lyl | 0.0001   | 8.523    | 0.4057   | 872.326  | 0.0001   |
| Control | wr  | 0.0001   | 3.0271   | 0.3051   | 0.1253   | 0.0001   |
| Control | wr  | 0.0001   | 47.2565  | 0.3089   | 0.0567   | 0.0001   |
| Control | wr  | 0.0001   | 2.6024   | 0.3039   | 0.0657   | 0.0001   |
| Control | wr  | 0.7317   | 0.4184   | 997.1649 | 0.1035   | 424.8489 |
| Control | wr  | 0.4385   | 0.4183   | 0.9132   | 0.1093   | 0.0001   |
| Control | wr  | 0.878    | 0.0001   | 995.74   | 0.0982   | 339.7319 |
| Control | wr  | 2.1963   | 1.6752   | 0.2948   | 0.1625   | 340.0721 |
| Control | wr  | 0.0001   | 29.5669  | 0.3113   | 0.142    | 0.0001   |
| Control | wr  | 0.0001   | 28.9053  | 0.3073   | 0.1442   | 0.0001   |
| Control | wr  | 0.4387   | 0.1043   | 0.3093   | 999      | 485.1787 |
| Control | wr  | 1.757    | 1.6754   | 0.3022   | 876.2383 | 0.4548   |
| Control | wr  | 0.8779   | 0.4182   | 0.3105   | 0.1103   | 339.7    |
| Control | wr  | 0.548    | 0.2782   | 999      | 0.0975   | 0.4557   |
| Control | wr  | 0.0001   | 13.7643  | 0.3101   | 0.0677   | 0.0001   |
| Control | wr  | 0.4386   | 0.0001   | 0.3086   | 0.0001   | 339.6812 |
| Control | xdh | 0.0001   | 8.6739   | 0.322    | 0.1274   | 0.0001   |
| Control | xdh | 0.0001   | 8.1242   | 0.3177   | 0.0842   | 0.0001   |
| Control | xdh | 0.0001   | 11.8047  | 0.3221   | 0.0001   | 0.0001   |
| Control | xdh | 0.0001   | 9.329    | 0.315    | 0.0758   | 0.0001   |
| Control | xdh | 0.0001   | 0.3086   | 0.3186   | 0.1182   | 0.0001   |
| Control | xdh | 0.0001   | 12.5591  | 0.3197   | 0.1094   | 0.0001   |
| Control | xdh | 0.0001   | 0.0001   | 0.3155   | 0.071    | 0.0001   |
| Control | xdh | 0.0001   | 7.7991   | 0.3107   | 0.0001   | 0.0001   |
| Control | xdh | 0.2189   | 0.4178   | 0.0001   | 0.0727   | 0.0001   |
| Control | xdh | 0.8769   | 999      | 0.324    | 0.0614   | 0.0001   |
| Control | xdh | 0.2642   | 0.8379   | 0.0001   | 0.0001   | 0.1522   |

**Table S4 Summary of positive selection analyses for genes LHBsAg, HBxAg, PreC/C and Pol.**

| Gene                              | LHBsAg       | HBxAg                  | PreC/C       | Pol                                          |
|-----------------------------------|--------------|------------------------|--------------|----------------------------------------------|
| <b>Model 1</b>                    |              |                        |              |                                              |
| lnL                               | -4900.388    | -1997.998              | -2309.669    | -10905.244                                   |
| $d_N/d_S$ ( $p_0$ )               | 0.099(0.470) | 0.047(0.511)           | 0.095(0.693) | 0.118(0.696)                                 |
| $d_N/d_S$ ( $p_1$ )               | 1.000(0.51)  | 1.000(0.489)           | 1.000(0.307) | 1.000(0.304)                                 |
| <b>Model 2</b>                    |              |                        |              |                                              |
| lnL                               | -4898.999    | -1986.074626           | -2308.911    | -10892.446                                   |
| $d_N/d_S$ ( $p_0$ )               | 0.23(0.667)  | 0.11(0.532)            | 0.113(0.713) | 0.138(0.71)                                  |
| $d_N/d_S$ ( $p_1$ )               | 1.000(0.000) | 1.000(0.379)           | 1.000(0.274) | 1.000(0.267)                                 |
| $d_N/d_S$ ( $p_2$ )               | 1.412(0.333) | 4.148(0.09)            | 3.41(0.013)  | 3.401(0.023)                                 |
| $2\Delta\ln L(\text{LRT})$ (2vs1) | 2.778        | 23.846748              | 1.516        | 25.596                                       |
| <i>P</i> Value                    | 0.096        | <b>1.04E-06</b>        | 0.218        | <b>4.21E-07</b>                              |
| Positively selected sites*        |              | 36A,130K,131V          |              | 803R,841R                                    |
| <b>Model 7</b>                    |              |                        |              |                                              |
| lnL                               | -4900.904    | -1998.123              | -2309.669    | -10910.344                                   |
| <i>p</i>                          | 0.109        | 0.02                   | 0.182        | 0.211                                        |
| <i>q</i>                          | 0.075        | 0.017                  | 0.314        | 0.323                                        |
| <b>Model 8</b>                    |              |                        |              |                                              |
| lnL                               | -4898.959    | -1983.569              | -2308.308    | -10892.589                                   |
| <i>p</i>                          | 7.762        | 0.237                  | 0.323        | 0.453                                        |
| <i>q</i>                          | 24.354       | 0.278                  | 0.658        | 0.911                                        |
| $p_0$                             | 0.677        | 0.901                  | 0.979        | 0.953                                        |
| $d_N/d_S$ ( $p_1$ )               | 1.427(0.323) | 4.016(0.099)           | 3.1(0.021)   | 2.726(0.047)                                 |
| $2\Delta\ln L(\text{LRT})$ (8vs7) | 3.89         | 29.108                 | 2.722        | 35.51                                        |
| <i>P</i> Value                    | <b>0.048</b> | <b>6.85E-08</b>        | 0.099        | <b>2.54E-09</b>                              |
| Positively selected sites*        | 300T         | 36A,44L,127V,130K,131V | 159P         | 136Y,237Q,251P,480N,613Q,615I,713Q,803R,841R |

\*:BEB>0.9

















|     |      |   |    |    |    |    |    |   |
|-----|------|---|----|----|----|----|----|---|
| D23 | 1679 | G | 20 | 20 | 0  | 0  | 0  | 0 |
| D23 | 1708 | T | 20 | 0  | 1  | 0  | 0  | 0 |
| D23 | 1719 | G | 20 | 0  | 0  | 0  | 20 | 0 |
| D23 | 1721 | A | 20 | 0  | 0  | 20 | 0  | 0 |
| D23 | 1731 | T | 20 | 0  | 1  | 0  | 0  | 0 |
| D23 | 1762 | A | 20 | 0  | 0  | 0  | 20 | 0 |
| D23 | 1766 | T | 20 | 0  | 20 | 0  | 0  | 0 |
| D23 | 1768 | A | 20 | 0  | 0  | 0  | 20 | 0 |
| D23 | 1778 | A | 20 | 0  | 0  | 2  | 0  | 0 |
| D23 | 1790 | T | 20 | 1  | 0  | 0  | 0  | 0 |
| D23 | 1805 | A | 20 | 0  | 0  | 2  | 0  | 0 |
| D23 | 1846 | T | 20 | 20 | 0  | 0  | 0  | 0 |
| D23 | 1863 | T | 20 | 0  | 1  | 0  | 0  | 0 |
| D23 | 1896 | A | 20 | 0  | 0  | 19 | 0  | 0 |
| D23 | 1913 | A | 20 | 0  | 20 | 0  | 0  | 0 |
| D23 | 1922 | C | 20 | 0  | 0  | 20 | 0  | 0 |
| D23 | 1923 | C | 20 | 20 | 0  | 0  | 0  | 0 |
| D23 | 1930 | A | 20 | 0  | 0  | 1  | 0  | 0 |
| D23 | 1933 | A | 20 | 0  | 0  | 0  | 20 | 0 |
| D23 | 1963 | T | 20 | 0  | 1  | 0  | 0  | 0 |
| D23 | 1966 | C | 20 | 0  | 0  | 0  | 1  | 0 |
| D23 | 1979 | G | 20 | 20 | 0  | 0  | 0  | 0 |
| D23 | 1981 | T | 20 | 0  | 1  | 0  | 0  | 0 |
| D23 | 1984 | T | 20 | 19 | 0  | 1  | 0  | 0 |
| D23 | 1999 | C | 20 | 0  | 0  | 0  | 2  | 0 |
| D23 | 2065 | C | 20 | 3  | 0  | 0  | 0  | 0 |
| D23 | 2078 | G | 20 | 0  | 20 | 0  | 0  | 0 |
| D23 | 2096 | A | 20 | 0  | 0  | 1  | 0  | 0 |
| D23 | 2107 | A | 20 | 0  | 20 | 0  | 0  | 0 |
| D23 | 2134 | T | 20 | 0  | 20 | 0  | 0  | 0 |
| D23 | 2158 | A | 20 | 0  | 20 | 0  | 0  | 0 |
| D23 | 2159 | A | 20 | 0  | 0  | 1  | 0  | 0 |
| D23 | 2184 | T | 20 | 1  | 0  | 0  | 0  | 0 |
| D23 | 2189 | A | 20 | 0  | 1  | 0  | 0  | 0 |
| D23 | 2202 | T | 20 | 0  | 1  | 1  | 0  | 0 |
| D23 | 2209 | C | 20 | 0  | 0  | 0  | 20 | 0 |
| D23 | 2216 | T | 20 | 0  | 1  | 0  | 0  | 0 |
| D23 | 2227 | T | 20 | 0  | 0  | 1  | 0  | 0 |
| D23 | 2299 | A | 20 | 0  | 0  | 2  | 0  | 0 |
| D23 | 2304 | C | 20 | 1  | 0  | 0  | 0  | 0 |
| D23 | 2323 | A | 20 | 0  | 0  | 0  | 2  | 0 |
| D23 | 2410 | A | 20 | 0  | 0  | 20 | 0  | 0 |
| D23 | 2430 | A | 20 | 0  | 0  | 2  | 0  | 0 |
| D23 | 2451 | A | 20 | 0  | 0  | 1  | 0  | 0 |
| D23 | 2456 | C | 20 | 0  | 0  | 0  | 3  | 0 |
| D23 | 2468 | T | 20 | 0  | 20 | 0  | 0  | 0 |
| D23 | 2489 | G | 20 | 2  | 0  | 0  | 0  | 0 |
| D23 | 2537 | T | 20 | 0  | 20 | 0  | 0  | 0 |
| D23 | 2541 | T | 20 | 0  | 1  | 0  | 0  | 0 |
| D23 | 2558 | G | 20 | 20 | 0  | 0  | 0  | 0 |
| D23 | 2560 | G | 20 | 20 | 0  | 0  | 0  | 0 |
| D23 | 2564 | A | 20 | 0  | 0  | 20 | 0  | 0 |
| D23 | 2573 | C | 20 | 0  | 0  | 0  | 20 | 0 |
| D23 | 2582 | C | 20 | 0  | 0  | 0  | 20 | 0 |
| D23 | 2590 | A | 20 | 0  | 0  | 1  | 0  | 0 |
| D23 | 2591 | C | 20 | 0  | 0  | 0  | 20 | 0 |
| D23 | 2594 | G | 20 | 20 | 0  | 0  | 0  | 0 |
| D23 | 2603 | C | 20 | 0  | 0  | 0  | 20 | 0 |
| D23 | 2612 | C | 20 | 0  | 0  | 0  | 20 | 0 |
| D23 | 2622 | A | 20 | 0  | 0  | 1  | 0  | 0 |
| D23 | 2627 | A | 20 | 0  | 0  | 1  | 0  | 0 |
| D23 | 2660 | C | 20 | 0  | 0  | 0  | 20 | 0 |
| D23 | 2681 | A | 20 | 0  | 0  | 20 | 0  | 0 |
| D23 | 2684 | T | 20 | 0  | 20 | 0  | 0  | 0 |
| D23 | 2699 | T | 20 | 1  | 0  | 19 | 0  | 0 |
| D23 | 2708 | T | 20 | 0  | 0  | 1  | 0  | 0 |
| D23 | 2712 | C | 20 | 0  | 0  | 0  | 19 | 0 |
| D23 | 2732 | T | 20 | 0  | 20 | 0  | 0  | 0 |
| D23 | 2740 | G | 20 | 0  | 0  | 0  | 1  | 0 |
| D23 | 2741 | A | 20 | 0  | 0  | 20 | 0  | 0 |
| D23 | 2771 | C | 20 | 0  | 0  | 0  | 19 | 0 |
| D23 | 2849 | T | 20 | 0  | 1  | 0  | 0  | 0 |
| D23 | 2856 | T | 20 | 0  | 1  | 0  | 0  | 0 |
| D23 | 2875 | A | 20 | 0  | 20 | 0  | 0  | 0 |
| D23 | 2890 | A | 20 | 0  | 0  | 1  | 0  | 0 |
| D23 | 2898 | G | 20 | 0  | 1  | 0  | 19 | 0 |
| D23 | 2900 | T | 20 | 0  | 0  | 1  | 0  | 0 |
| D23 | 2928 | T | 20 | 0  | 1  | 0  | 0  | 0 |
| D23 | 2952 | A | 20 | 0  | 0  | 1  | 0  | 0 |
| D23 | 2958 | T | 20 | 0  | 20 | 0  | 0  | 0 |
| D23 | 2995 | G | 20 | 1  | 0  | 0  | 0  | 0 |
| D23 | 3000 | C | 20 | 0  | 0  | 0  | 20 | 0 |
| D23 | 3008 | C | 20 | 20 | 0  | 0  | 0  | 0 |
| D23 | 3013 | A | 20 | 0  | 0  | 3  | 0  | 0 |
| D23 | 3046 | T | 20 | 0  | 1  | 0  | 0  | 0 |
| D23 | 3051 | T | 20 | 0  | 20 | 0  | 0  | 0 |
| D23 | 3057 | C | 20 | 20 | 0  | 0  | 0  | 0 |
| D23 | 3064 | A | 20 | 0  | 0  | 20 | 0  | 0 |
| D23 | 3066 | T | 20 | 0  | 1  | 0  | 0  | 0 |
| D23 | 3084 | G | 20 | 0  | 0  | 0  | 20 | 0 |
| D23 | 3099 | A | 20 | 0  | 1  | 0  | 0  | 0 |
| D23 | 3105 | T | 20 | 20 | 0  | 0  | 0  | 0 |
| D23 | 3120 | G | 20 | 20 | 0  | 0  | 0  | 0 |
| D23 | 3150 | A | 20 | 0  | 0  | 2  | 0  | 0 |
| D23 | 3160 | C | 20 | 0  | 0  | 0  | 1  | 0 |
| D23 | 3172 | T | 20 | 0  | 1  | 0  | 0  | 0 |
| D23 | 3180 | T | 20 | 0  | 2  | 0  | 0  | 0 |
| D23 | 3204 | T | 20 | 0  | 20 | 0  | 0  | 0 |
| D02 | 6    | C | 16 | 0  | 0  | 0  | 1  | 0 |
| D02 | 9    | C | 16 | 0  | 0  | 0  | 1  | 0 |
| D02 | 10   | C | 16 | 0  | 0  | 5  | 11 | 0 |
| D02 | 19   | A | 16 | 0  | 0  | 0  | 11 | 0 |
| D02 | 24   | T | 16 | 1  | 0  | 0  | 0  | 0 |
| D02 | 29   | G | 16 | 10 | 0  | 0  | 0  | 0 |
| D02 | 36   | G | 16 | 16 | 0  | 0  | 0  | 0 |
| D02 | 176  | T | 16 | 0  | 1  | 0  | 0  | 0 |
| D02 | 189  | T | 16 | 0  | 0  | 11 | 0  | 0 |
| D02 | 213  | T | 16 | 0  | 1  | 0  | 0  | 0 |
| D02 | 241  | G | 16 | 10 | 0  | 0  | 0  | 0 |
| D02 | 285  | G | 16 | 1  | 0  | 0  | 0  | 0 |
| D02 | 323  | A | 16 | 0  | 0  | 1  | 0  | 0 |
| D02 | 333  | A | 16 | 0  | 11 | 0  | 0  | 0 |
| D02 | 339  | C | 16 | 0  | 0  | 0  | 11 | 0 |
| D02 | 382  | T | 16 | 0  | 1  | 0  | 0  | 0 |
| D02 | 387  | G | 16 | 11 | 0  | 0  | 0  | 0 |
| D02 | 482  | A | 16 | 0  | 11 | 0  | 0  | 0 |
| D02 | 495  | C | 16 | 0  | 0  | 0  | 1  | 0 |
| D02 | 514  | A | 16 | 0  | 0  | 3  | 0  | 0 |
| D02 | 522  | C | 16 | 0  | 0  | 0  | 2  | 0 |
| D02 | 554  | T | 16 | 11 | 0  | 0  | 0  | 0 |
| D02 | 558  | C | 16 | 0  | 0  | 0  | 8  | 0 |

|     |      |   |    |    |    |    |    |   |
|-----|------|---|----|----|----|----|----|---|
| D02 | 574  | C | 16 | 7  | 0  | 0  | 0  | 0 |
| D02 | 587  | G | 16 | 8  | 0  | 0  | 0  | 0 |
| D02 | 591  | A | 16 | 0  | 1  | 0  | 0  | 0 |
| D02 | 636  | A | 16 | 0  | 0  | 0  | 7  | 0 |
| D02 | 667  | C | 16 | 0  | 0  | 0  | 3  | 0 |
| D02 | 670  | C | 16 | 1  | 0  | 0  | 0  | 0 |
| D02 | 686  | C | 16 | 0  | 0  | 0  | 1  | 0 |
| D02 | 688  | A | 16 | 0  | 16 | 0  | 0  | 0 |
| D02 | 700  | G | 16 | 1  | 0  | 0  | 0  | 0 |
| D02 | 705  | T | 16 | 0  | 0  | 1  | 0  | 0 |
| D02 | 717  | C | 16 | 0  | 0  | 0  | 1  | 0 |
| D02 | 739  | A | 16 | 0  | 0  | 1  | 0  | 0 |
| D02 | 748  | G | 16 | 8  | 0  | 0  | 0  | 0 |
| D02 | 749  | T | 16 | 1  | 0  | 0  | 0  | 0 |
| D02 | 750  | G | 16 | 8  | 0  | 0  | 0  | 0 |
| D02 | 770  | T | 16 | 0  | 8  | 0  | 0  | 0 |
| D02 | 771  | A | 16 | 0  | 0  | 1  | 0  | 0 |
| D02 | 798  | T | 16 | 0  | 1  | 0  | 0  | 0 |
| D02 | 832  | T | 16 | 0  | 3  | 0  | 0  | 0 |
| D02 | 837  | C | 16 | 0  | 0  | 0  | 8  | 0 |
| D02 | 838  | T | 16 | 0  | 16 | 0  | 0  | 0 |
| D02 | 849  | T | 16 | 5  | 0  | 0  | 0  | 0 |
| D02 | 853  | A | 16 | 0  | 5  | 0  | 0  | 0 |
| D02 | 912  | A | 16 | 0  | 0  | 8  | 0  | 0 |
| D02 | 927  | A | 16 | 0  | 0  | 1  | 0  | 0 |
| D02 | 942  | G | 16 | 15 | 0  | 0  | 0  | 0 |
| D02 | 970  | C | 16 | 0  | 0  | 0  | 1  | 0 |
| D02 | 981  | G | 16 | 0  | 1  | 0  | 0  | 0 |
| D02 | 987  | A | 16 | 0  | 0  | 0  | 1  | 0 |
| D02 | 994  | A | 16 | 0  | 6  | 0  | 0  | 0 |
| D02 | 1000 | T | 16 | 0  | 0  | 2  | 0  | 0 |
| D02 | 1009 | C | 16 | 0  | 0  | 0  | 16 | 0 |
| D02 | 1029 | T | 16 | 0  | 15 | 0  | 0  | 0 |
| D02 | 1042 | T | 16 | 0  | 1  | 0  | 0  | 0 |
| D02 | 1044 | C | 16 | 0  | 0  | 0  | 16 | 0 |
| D02 | 1077 | A | 16 | 0  | 10 | 0  | 0  | 0 |
| D02 | 1095 | T | 16 | 0  | 1  | 0  | 0  | 0 |
| D02 | 1124 | A | 16 | 0  | 0  | 16 | 0  | 0 |
| D02 | 1125 | C | 16 | 0  | 0  | 0  | 16 | 0 |
| D02 | 1126 | A | 16 | 0  | 1  | 0  | 0  | 0 |
| D02 | 1128 | A | 16 | 0  | 6  | 0  | 0  | 0 |
| D02 | 1135 | A | 16 | 0  | 0  | 6  | 0  | 0 |
| D02 | 1139 | A | 16 | 0  | 2  | 0  | 0  | 0 |
| D02 | 1173 | G | 16 | 14 | 1  | 0  | 0  | 0 |
| D02 | 1175 | A | 16 | 0  | 0  | 16 | 0  | 0 |
| D02 | 1218 | C | 16 | 0  | 0  | 0  | 1  | 0 |
| D02 | 1252 | T | 16 | 0  | 0  | 16 | 0  | 0 |
| D02 | 1254 | T | 16 | 0  | 0  | 1  | 0  | 0 |
| D02 | 1278 | A | 16 | 0  | 0  | 1  | 0  | 0 |
| D02 | 1287 | T | 16 | 0  | 16 | 0  | 0  | 0 |
| D02 | 1306 | A | 16 | 0  | 16 | 0  | 0  | 0 |
| D02 | 1320 | C | 16 | 16 | 0  | 0  | 0  | 0 |
| D02 | 1321 | C | 16 | 2  | 0  | 0  | 0  | 0 |
| D02 | 1337 | A | 16 | 0  | 1  | 0  | 0  | 0 |
| D02 | 1350 | T | 16 | 0  | 0  | 1  | 0  | 0 |
| D02 | 1362 | C | 16 | 0  | 0  | 0  | 16 | 0 |
| D02 | 1365 | A | 16 | 0  | 1  | 0  | 0  | 0 |
| D02 | 1375 | T | 16 | 0  | 1  | 0  | 0  | 0 |
| D02 | 1381 | C | 16 | 0  | 0  | 0  | 1  | 0 |
| D02 | 1417 | T | 16 | 0  | 1  | 0  | 0  | 0 |
| D02 | 1425 | T | 16 | 0  | 16 | 0  | 0  | 0 |
| D02 | 1432 | C | 16 | 0  | 0  | 0  | 1  | 0 |
| D02 | 1437 | A | 16 | 0  | 0  | 16 | 0  | 0 |
| D02 | 1450 | G | 16 | 1  | 0  | 0  | 0  | 0 |
| D02 | 1480 | A | 16 | 0  | 0  | 1  | 0  | 0 |
| D02 | 1485 | T | 16 | 0  | 16 | 0  | 0  | 0 |
| D02 | 1497 | C | 16 | 0  | 0  | 0  | 16 | 0 |
| D02 | 1499 | G | 16 | 11 | 0  | 0  | 0  | 0 |
| D02 | 1508 | T | 16 | 15 | 0  | 0  | 0  | 0 |
| D02 | 1511 | T | 16 | 1  | 0  | 0  | 0  | 0 |
| D02 | 1544 | T | 16 | 16 | 0  | 0  | 0  | 0 |
| D02 | 1553 | T | 16 | 0  | 1  | 0  | 0  | 0 |
| D02 | 1575 | C | 16 | 0  | 0  | 0  | 1  | 0 |
| D02 | 1583 | A | 16 | 0  | 0  | 1  | 0  | 0 |
| D02 | 1632 | A | 16 | 0  | 16 | 0  | 0  | 0 |
| D02 | 1635 | G | 16 | 16 | 0  | 0  | 0  | 0 |
| D02 | 1637 | C | 16 | 15 | 0  | 1  | 0  | 0 |
| D02 | 1647 | G | 16 | 1  | 0  | 0  | 0  | 0 |
| D02 | 1652 | G | 16 | 3  | 0  | 0  | 0  | 0 |
| D02 | 1655 | T | 16 | 0  | 2  | 0  | 0  | 0 |
| D02 | 1657 | A | 16 | 0  | 0  | 1  | 0  | 0 |
| D02 | 1691 | C | 16 | 0  | 0  | 0  | 1  | 0 |
| D02 | 1742 | G | 16 | 14 | 0  | 0  | 2  | 0 |
| D02 | 1747 | A | 16 | 0  | 5  | 0  | 0  | 0 |
| D02 | 1748 | G | 16 | 0  | 0  | 0  | 9  | 0 |
| D02 | 1751 | G | 16 | 0  | 0  | 0  | 8  | 0 |
| D02 | 1752 | A | 16 | 0  | 0  | 1  | 1  | 0 |
| D02 | 1753 | T | 16 | 5  | 11 | 0  | 0  | 0 |
| D02 | 1762 | A | 16 | 0  | 0  | 0  | 16 | 0 |
| D02 | 1763 | G | 16 | 1  | 0  | 0  | 0  | 0 |
| D02 | 1766 | C | 16 | 0  | 0  | 0  | 10 | 0 |
| D02 | 1768 | T | 16 | 11 | 0  | 0  | 0  | 0 |
| D02 | 1769 | C | 16 | 0  | 0  | 0  | 16 | 0 |
| D02 | 1773 | C | 16 | 0  | 0  | 0  | 8  | 0 |
| D02 | 1820 | A | 16 | 0  | 16 | 0  | 0  | 0 |
| D02 | 1846 | A | 16 | 0  | 0  | 0  | 1  | 0 |
| D02 | 1853 | T | 16 | 0  | 1  | 0  | 0  | 0 |
| D02 | 1862 | G | 16 | 0  | 0  | 0  | 1  | 0 |
| D02 | 1896 | G | 16 | 11 | 0  | 0  | 0  | 0 |
| D02 | 1899 | G | 16 | 1  | 0  | 0  | 0  | 0 |
| D02 | 1917 | A | 16 | 0  | 0  | 0  | 1  | 0 |
| D02 | 1944 | T | 16 | 0  | 1  | 0  | 0  | 0 |
| D02 | 1961 | T | 16 | 11 | 0  | 0  | 0  | 0 |
| D02 | 1962 | C | 16 | 1  | 0  | 0  | 0  | 0 |
| D02 | 1966 | T | 16 | 0  | 1  | 0  | 0  | 0 |
| D02 | 1975 | G | 16 | 8  | 0  | 0  | 0  | 0 |
| D02 | 1983 | G | 16 | 11 | 0  | 0  | 0  | 0 |
| D02 | 1984 | G | 16 | 16 | 0  | 0  | 0  | 0 |
| D02 | 1987 | C | 16 | 0  | 0  | 0  | 1  | 0 |
| D02 | 1990 | T | 16 | 0  | 9  | 0  | 0  | 0 |
| D02 | 1991 | C | 16 | 10 | 0  | 0  | 1  | 0 |
| D02 | 1999 | C | 16 | 2  | 0  | 0  | 0  | 0 |
| D02 | 2003 | T | 16 | 11 | 0  | 0  | 0  | 0 |
| D02 | 2011 | C | 16 | 0  | 0  | 16 | 0  | 0 |
| D02 | 2035 | A | 16 | 0  | 0  | 16 | 0  | 0 |
| D02 | 2037 | A | 16 | 0  | 0  | 1  | 0  | 0 |
| D02 | 2038 | A | 16 | 0  | 0  | 1  | 0  | 0 |
| D02 | 2044 | T | 16 | 0  | 9  | 0  | 0  | 0 |
| D02 | 2053 | C | 16 | 0  | 0  | 0  | 7  | 0 |
| D02 | 2074 | T | 16 | 16 | 0  | 0  | 0  | 0 |
| D02 | 2075 | G | 16 | 16 | 0  | 0  | 0  | 0 |
| D02 | 2083 | T | 16 | 0  | 5  | 0  | 0  | 0 |

|     |      |   |    |    |    |    |    |   |
|-----|------|---|----|----|----|----|----|---|
| D02 | 2086 | G | 16 | 0  | 0  | 0  | 11 | 0 |
| D02 | 2089 | T | 16 | 0  | 0  | 16 | 0  | 0 |
| D02 | 2091 | A | 16 | 0  | 0  | 1  | 0  | 0 |
| D02 | 2097 | T | 16 | 10 | 0  | 1  | 0  | 0 |
| D02 | 2098 | G | 16 | 0  | 0  | 0  | 11 | 0 |
| D02 | 2109 | C | 16 | 1  | 0  | 0  | 0  | 0 |
| D02 | 2120 | A | 16 | 0  | 0  | 5  | 0  | 0 |
| D02 | 2126 | T | 16 | 0  | 1  | 0  | 0  | 0 |
| D02 | 2131 | A | 16 | 0  | 11 | 0  | 0  | 0 |
| D02 | 2145 | G | 16 | 11 | 0  | 0  | 0  | 0 |
| D02 | 2150 | T | 16 | 5  | 0  | 0  | 0  | 0 |
| D02 | 2160 | G | 16 | 1  | 0  | 0  | 0  | 0 |
| D02 | 2176 | T | 16 | 0  | 8  | 0  | 0  | 0 |
| D02 | 2191 | C | 16 | 0  | 0  | 0  | 16 | 0 |
| D02 | 2198 | C | 16 | 5  | 0  | 0  | 0  | 0 |
| D02 | 2203 | T | 16 | 0  | 0  | 16 | 0  | 0 |
| D02 | 2219 | T | 16 | 0  | 1  | 0  | 0  | 0 |
| D02 | 2239 | A | 16 | 0  | 16 | 0  | 0  | 0 |
| D02 | 2245 | C | 16 | 0  | 0  | 0  | 16 | 0 |
| D02 | 2260 | G | 16 | 16 | 0  | 0  | 0  | 0 |
| D02 | 2266 | C | 16 | 0  | 0  | 0  | 16 | 0 |
| D02 | 2271 | T | 16 | 0  | 1  | 0  | 0  | 0 |
| D02 | 2290 | C | 16 | 5  | 0  | 0  | 0  | 0 |
| D02 | 2304 | C | 16 | 11 | 0  | 0  | 0  | 0 |
| D02 | 2345 | G | 16 | 11 | 0  | 0  | 0  | 0 |
| D02 | 2351 | C | 16 | 0  | 0  | 10 | 0  | 0 |
| D02 | 2352 | G | 16 | 1  | 0  | 0  | 0  | 0 |
| D02 | 2364 | C | 16 | 0  | 0  | 11 | 0  | 0 |
| D02 | 2369 | A | 16 | 0  | 0  | 11 | 0  | 0 |
| D02 | 2376 | G | 16 | 1  | 0  | 0  | 0  | 0 |
| D02 | 2401 | A | 16 | 0  | 0  | 16 | 0  | 0 |
| D02 | 2456 | T | 16 | 0  | 16 | 0  | 0  | 0 |
| D02 | 2489 | G | 16 | 0  | 0  | 0  | 1  | 0 |
| D02 | 2538 | T | 16 | 0  | 1  | 0  | 0  | 0 |
| D02 | 2567 | C | 16 | 0  | 0  | 0  | 5  | 0 |
| D02 | 2590 | T | 16 | 0  | 1  | 0  | 0  | 0 |
| D02 | 2618 | A | 16 | 0  | 0  | 16 | 0  | 0 |
| D02 | 2621 | A | 16 | 0  | 0  | 16 | 0  | 0 |
| D02 | 2636 | C | 16 | 0  | 0  | 0  | 16 | 0 |
| D02 | 2642 | T | 16 | 0  | 1  | 0  | 0  | 0 |
| D02 | 2659 | A | 16 | 0  | 8  | 0  | 0  | 0 |
| D02 | 2660 | C | 16 | 3  | 0  | 2  | 0  | 0 |
| D02 | 2663 | T | 16 | 0  | 0  | 1  | 0  | 0 |
| D02 | 2675 | A | 16 | 0  | 0  | 16 | 0  | 0 |
| D02 | 2681 | G | 16 | 16 | 0  | 0  | 0  | 0 |
| D02 | 2711 | G | 16 | 16 | 0  | 0  | 0  | 0 |
| D02 | 2720 | T | 16 | 0  | 10 | 0  | 0  | 0 |
| D02 | 2810 | C | 16 | 0  | 0  | 0  | 16 | 0 |
| D02 | 2853 | A | 16 | 0  | 0  | 1  | 0  | 0 |
| D02 | 2854 | G | 16 | 8  | 0  | 0  | 1  | 0 |
| D02 | 2865 | C | 16 | 2  | 0  | 0  | 0  | 0 |
| D02 | 2875 | A | 16 | 0  | 0  | 1  | 0  | 0 |
| D02 | 2946 | A | 16 | 0  | 0  | 5  | 0  | 0 |
| D02 | 2973 | G | 16 | 0  | 0  | 0  | 5  | 0 |
| D02 | 3040 | T | 16 | 0  | 5  | 0  | 0  | 0 |
| D02 | 3045 | G | 16 | 0  | 0  | 0  | 5  | 0 |
| D02 | 3051 | T | 16 | 0  | 5  | 0  | 0  | 0 |
| D02 | 3057 | T | 16 | 5  | 0  | 0  | 0  | 0 |
| D02 | 3059 | A | 16 | 0  | 0  | 1  | 0  | 0 |
| D02 | 3087 | G | 16 | 5  | 0  | 0  | 0  | 0 |
| D02 | 3088 | G | 16 | 0  | 0  | 0  | 5  | 0 |
| D02 | 3099 | T | 16 | 5  | 0  | 0  | 0  | 0 |
| D02 | 3144 | G | 16 | 1  | 0  | 0  | 0  | 0 |
| D02 | 3154 | A | 16 | 0  | 0  | 4  | 0  | 0 |
| D02 | 3166 | C | 16 | 0  | 0  | 0  | 1  | 0 |
| D02 | 3183 | A | 16 | 0  | 0  | 11 | 0  | 0 |
| D02 | 3196 | C | 16 | 0  | 0  | 0  | 1  | 0 |
| D02 | 3198 | T | 16 | 11 | 0  | 0  | 0  | 0 |
| D02 | 3209 | A | 16 | 0  | 0  | 11 | 0  | 0 |

**Table S6 Amino acid variations for A epitope (aa124–aa147).**

| Experimental group | Genotype C |               | Genotype I |                    |        |
|--------------------|------------|---------------|------------|--------------------|--------|
|                    | Number     | Control group | Number     | Experimental group | Number |
| C124S              | 1          | I126S         | 13         | Y134N              | 11     |
| T125M              | 3          | I126G         | 2          | P135L              | 8      |
| I126T              | 24         | Q129R         | 2          | G145R              | 8      |
| I126V              | 3          | M133T         | 1          | N146T              | 1      |
| G130N              | 9          | K141E         | 1          |                    |        |
| G130R              | 5          |               |            |                    |        |
| G130E              | 1          |               |            |                    |        |
| T131I              | 1          |               |            |                    |        |
| T131N              | 1          |               |            |                    |        |
| M133T              | 5          |               |            |                    |        |
| F134Y              | 14         |               |            |                    |        |
| D144V              | 6          |               |            |                    |        |
| D144A              | 3          |               |            |                    |        |

**Number of substitutions per 100 amino acid**

|                                    | Experimental group | Control group | p      |
|------------------------------------|--------------------|---------------|--------|
| <b>a' determinant (aa 124-147)</b> | 4.76               | 0.91          | 0.0001 |

**Table S7 Number of variation at Core Promoter and pre-Core region (nt1742-1900) in present study.**

| mutations | Experimental group (91) |             | Control group (87) |             | <i>p</i> value Chi-square test |
|-----------|-------------------------|-------------|--------------------|-------------|--------------------------------|
|           | wild type               | mutant type | wild type          | mutant type |                                |
| A1762T    | 13                      | 78          | 63                 | 24          | 1.52064E-14                    |
| G1764A    | 13                      | 78          | 58                 | 29          | 2.92985E-12                    |
| T1753C    | 51                      | 40          | 87                 | 0           | 7.71992E-12                    |
| A1755C    | 76                      | 15          | 87                 | 0           | 0.00022653                     |
| G1742A    | 77                      | 14          | 87                 | 0           | 0.000410948                    |
| G1896A    | 77                      | 14          | 87                 | 0           | 0.000410948                    |
| T1802C    | 78                      | 13          | 87                 | 0           | 0.000742127                    |
| G1899A    | 78                      | 13          | 87                 | 0           | 0.000742127                    |
| T1768A    | 80                      | 11          | 87                 | 0           | 0.002392226                    |
| A1846T    | 77                      | 14          | 85                 | 2           | 0.005285676                    |
| C1773T    | 83                      | 8           | 87                 | 0           | 0.013586221                    |
| A1775G    | 76                      | 15          | 82                 | 5           | 0.042368534                    |
| T1861C    | 88                      | 3           | 87                 | 0           | 0.260341026                    |
| C1766T    | 81                      | 10          | 72                 | 15          | 0.324954096                    |
| C1799G    | 78                      | 13          | 75                 | 12          | 1                              |

**Table S8 Amino acid variations for genotype C HBV genome.**

| Genes  | Position | Mutations | Experimental group<br>(62 clones) |             | Control group<br>(59 clones) |        | <i>p</i> value<br>Chi-square<br>test | Epitopes     |
|--------|----------|-----------|-----------------------------------|-------------|------------------------------|--------|--------------------------------------|--------------|
|        |          |           | wild type                         | mutant type | wild type                    | mutant |                                      |              |
| HBcAg  | 13       | V13L      | 48                                | 14          | 59                           | 0      | 0                                    | HLA I/II T,B |
| HBcAg  | 21       | S21A      | 62                                | 0           | 43                           | 16     | 0                                    | HLA I/II T,B |
| HBcAg  | 24       | F24S      | 62                                | 0           | 57                           | 2      | 0.236                                | HLA I/II T,B |
| HBcAg  | 25       | V25I      | 0                                 | 62          | 59                           | 0      | 0                                    | HLA I/II T,B |
| HBcAg  | 35       | S35A      | 48                                | 14          | 59                           | 0      | 0                                    | HLA I/II T,B |
| HBcAg  | 58       | A58D      | 48                                | 14          | 59                           | 0      | 0                                    | HLA II T,B   |
| HBcAg  | 60       | V60L      | 0                                 | 62          | 0                            | 59     | 1                                    | HLA I/II T,B |
| HBcAg  | 83       | E83D      | 58                                | 4           | 57                           | 2      | 0.68                                 | HLA I/II T,B |
| HBcAg  | 87       | S87G/R    | 56                                | 6           | 57                           | 2      | 0.274                                | HLA I/II T,B |
| HBcAg  | 94       | I94L      | 62                                | 0           | 57                           | 2      | 0.236                                | HLA I/II T,B |
| HBcAg  | 96       | K96N      | 60                                | 2           | 59                           | 0      | 0.496                                | HLA I/II T,B |
| HBcAg  | 97       | I97L      | 48                                | 14          | 59                           | 0      | 0                                    | HLA I/II T,B |
| HBcAg  | 100      | L100I     | 50                                | 12          | 59                           | 0      | 0                                    | HLA I/II T,B |
| HBcAg  | 101      | I101W     | 61                                | 1           | 58                           | 1      | 1                                    | HLA I/II T,B |
| HBcAg  | 112      | R112G     | 62                                | 0           | 56                           | 3      | 0.113                                | HLA I/II T,B |
| HBcAg  | 115      | V115A     | 62                                | 0           | 56                           | 3      | 0.113                                | HLA I/II T,B |
| HBcAg  | 119      | L119S     | 62                                | 0           | 56                           | 3      | 0.113                                | HLA I / II T |
| HBcAg  | 120      | V120A     | 62                                | 0           | 56                           | 3      | 0.113                                | HLA I/II T,B |
| HBcAg  | 130      | P130S/T   | 48                                | 14          | 29                           | 30     | 0.001                                | HLA I/II T,B |
| HBcAg  | 135      | P135Q     | 61                                | 1           | 58                           | 1      | 1                                    | HLA I/II T,B |
| HBcAg  | 148      | V148I     | 48                                | 14          | 59                           | 0      | 0                                    | HLA I/II T,B |
| HBcAg  | 152      | R152Q     | 58                                | 4           | 59                           | 0      | 0.119                                | HLA I/II T,B |
| HBcAg  | 153      | G153C     | 62                                | 0           | 57                           | 2      | 0.236                                | HLA I/II T,B |
| HBcAg  | 155      | S155T     | 60                                | 2           | 59                           | 0      | 0.496                                | HLA II T,B   |
| HBcAg  | 162      | S162L     | 62                                | 0           | 56                           | 3      | 0.113                                | HLA I/II T,B |
| HBcAg  | 170      | S170P     | 62                                | 0           | 56                           | 3      | 0.113                                | HLA II T,B   |
| HBcAg  | 177      | Q177R     | 60                                | 2           | 54                           | 5      | 0.265                                | HLA II T,B   |
| HBcAg  | 180      | E180G     | 62                                | 0           | 44                           | 15     | 0                                    | HLA II T,B   |
| HBxAg  | 4        | R4G       | 56                                | 6           | 59                           | 0      | 0.028                                | B            |
| HBxAg  | 5        | L5V/P     | 16                                | 46          | 29                           | 30     | 0.009                                | B            |
| HBxAg  | 21       | V21F      | 58                                | 4           | 59                           | 0      | 0.119                                | B            |
| HBxAg  | 29       | S29P      | 0                                 | 62          | 0                            | 59     | 1                                    | B            |
| HBxAg  | 30       | V30I      | 62                                | 0           | 41                           | 18     | 0                                    | B            |
| HBxAg  | 32       | S32R      | 58                                | 4           | 59                           | 0      | 0.119                                | B            |
| HBxAg  | 35       | G35R      | 54                                | 8           | 59                           | 0      | 0.006                                | B            |
| HBxAg  | 36       | G36S/A/T  | 0                                 | 62          | 12                           | 47     | 0                                    | B            |
| HBxAg  | 38       | P38S/L    | 60                                | 2           | 59                           | 0      | 0.496                                | B            |
| HBxAg  | 42       | L42S      | 0                                 | 62          | 12                           | 47     | 0                                    | B            |
| HBxAg  | 43       | S43P      | 55                                | 7           | 44                           | 15     | 0.059                                | B            |
| HBxAg  | 47       | A47T      | 54                                | 8           | 44                           | 15     | 0.105                                | B            |
| HBxAg  | 48       | N48D      | 0                                 | 62          | 0                            | 59     | 1                                    | B            |
| HBxAg  | 59       | P59S      | 62                                | 0           | 57                           | 2      | 0.236                                | HLA I T,B    |
| HBxAg  | 61       | C61R/Y    | 62                                | 0           | 53                           | 6      | 0.012                                | HLA II T,B   |
| HBxAg  | 64       | S64T      | 62                                | 0           | 47                           | 12     | 0                                    | HLA II T,B   |
| HBxAg  | 79       | M79I      | 58                                | 4           | 59                           | 0      | 0.119                                | B            |
| HBxAg  | 86       | R86H/L/S  | 15                                | 47          | 41                           | 18     | 0                                    | B            |
| HBxAg  | 94       | Y94H      | 0                                 | 62          | 0                            | 59     | 1                                    | HLA I T,B    |
| HBxAg  | 95       | K95N      | 62                                | 0           | 45                           | 14     | 0                                    | HLA I/II T,B |
| HBxAg  | 96       | R96K/G    | 60                                | 2           | 59                           | 0      | 0.496                                | HLA I/II T,B |
| HBxAg  | 101      | S101P/A   | 52                                | 10          | 44                           | 15     | 0.263                                | HLA I/II T,B |
| HBxAg  | 112      | F112S     | 58                                | 4           | 59                           | 0      | 0.119                                | HLA II T,B   |
| HBxAg  | 116      | V116L     | 29                                | 33          | 44                           | 15     | 0.003                                | HLA I/II T,B |
| HBxAg  | 123      | L123S     | 62                                | 0           | 41                           | 18     | 0                                    | HLA I/II T,B |
| HBxAg  | 127      | I127T     | 33                                | 29          | 59                           | 0      | 0                                    | HLA II T,B   |
| HBxAg  | 130      | K130M     | 13                                | 49          | 41                           | 18     | 0                                    | HLA II T,B   |
| HBxAg  | 131      | I131V/T   | 49                                | 13          | 35                           | 24     | 0.029                                | HLA II T,B   |
| HBxAg  | 132      | Y132F     | 0                                 | 62          | 17                           | 42     | 0                                    | HLA II T,B   |
| LHBsAg | 1        | M1T       | 61                                | 1           | 58                           | 1      | 1                                    |              |
| LHBsAg | 10       | K10Q      | 4                                 | 58          | 12                           | 47     | 0.032                                | HLA II T     |
| LHBsAg | 14       | T14S      | 62                                | 0           | 54                           | 5      | 0.025                                | HLA II T     |
| LHBsAg | 27       | D27G      | 48                                | 14          | 41                           | 18     | 0.41                                 | HLA I T,B    |
| LHBsAg | 35       | G35R      | 62                                | 0           | 56                           | 3      | 0.113                                | HLA I T,B    |
| LHBsAg | 41       | P41S      | 62                                | 0           | 47                           | 12     | 0                                    | B            |
| LHBsAg | 50       | D50G      | 60                                | 2           | 59                           | 0      | 0.496                                |              |
| LHBsAg | 51       | H51Q      | 47                                | 15          | 41                           | 18     | 0.541                                |              |
| LHBsAg | 54       | A54E      | 15                                | 47          | 30                           | 29     | 0.003                                |              |
| LHBsAg | 55       | N55D/E    | 54                                | 8           | 59                           | 0      | 0.006                                |              |
| LHBsAg | 60       | A60V      | 37                                | 25          | 41                           | 18     | 0.342                                | B            |

|        |     |             |    |    |    |    |       |                  |
|--------|-----|-------------|----|----|----|----|-------|------------------|
| LHBsAg | 62  | A62S        | 47 | 15 | 41 | 18 | 0.541 | B                |
| LHBsAg | 67  | F67L        | 60 | 2  | 59 | 0  | 0.496 |                  |
| LHBsAg | 73  | S73G        | 20 | 42 | 30 | 29 | 0.044 | B                |
| LHBsAg | 77  | W77S        | 52 | 10 | 59 | 0  | 0.001 | HLA I T,B        |
| LHBsAg | 88  | V88M/A      | 57 | 5  | 59 | 0  | 0.058 | B                |
| LHBsAg | 90  | A90V        | 49 | 13 | 44 | 15 | 0.667 | B                |
| LHBsAg | 98  | N98T        | 60 | 2  | 59 | 0  | 0.496 |                  |
| LHBsAg | 102 | G102R       | 60 | 2  | 59 | 0  | 0.496 |                  |
| LHBsAg | 105 | P105S       | 57 | 5  | 59 | 0  | 0.058 | B                |
| LHBsAg | 120 | M120T/V     | 48 | 14 | 59 | 0  | 0     | HLA I/II T,B     |
| LHBsAg | 125 | T125S       | 47 | 15 | 41 | 18 | 0.541 | HLA I/II T,B     |
| LHBsAg | 128 | H128L       | 48 | 14 | 59 | 0  | 0     | HLA I/II T,B     |
| LHBsAg | 130 | A130T       | 49 | 13 | 59 | 0  | 0     | HLA I/II T,B     |
| LHBsAg | 132 | L132Q       | 48 | 14 | 59 | 0  | 0     | HLA I/II T,B     |
| LHBsAg | 133 | D133G       | 62 | 0  | 57 | 2  | 0.236 | HLA I/II T,B     |
| LHBsAg | 141 | F141C       | 60 | 2  | 59 | 0  | 0.496 | HLA II T,B       |
| LHBsAg | 152 | N152S       | 59 | 3  | 58 | 1  | 0.619 | HLA II T,B       |
| LHBsAg | 158 | A158V       | 55 | 7  | 59 | 0  | 0.013 | HLA II T,B       |
| LHBsAg | 161 | I161V       | 62 | 0  | 41 | 18 | 0     | HLA II T,B       |
| LHBsAg | 164 | I164V       | 60 | 2  | 59 | 0  | 0.496 | B                |
| LHBsAg | 165 | F165S       | 48 | 14 | 59 | 0  | 0     |                  |
| LHBsAg | 168 | T168I       | 49 | 13 | 59 | 0  | 0     |                  |
| LHBsAg | 173 | A173P       | 14 | 48 | 0  | 59 | 0     | HLA I T          |
| LHBsAg | 173 | A173L       | 48 | 14 | 59 | 0  | 0     | HLA I T          |
| LHBsAg | 174 | N174S       | 62 | 0  | 55 | 4  | 0.054 | HLA I T          |
| LHBsAg | 177 | N177S       | 16 | 46 | 41 | 18 | 0     | HLA I T/HLA II T |
| LHBsAg | 178 | T178I       | 48 | 14 | 59 | 0  | 0     | HLA I T/HLA II T |
| LHBsAg | 182 | F182L       | 60 | 2  | 59 | 0  | 0.496 | HLA I/II T,B     |
| LHBsAg | 184 | G184R/K/T   | 46 | 16 | 59 | 0  | 0     | HLA I/II T,B     |
| LHBsAg | 188 | V188A       | 47 | 15 | 59 | 0  | 0     | HLA I/II T,B     |
| LHBsAg | 194 | F194S       | 60 | 2  | 59 | 0  | 0.496 | HLA I T,B        |
| LHBsAg | 195 | L195W       | 58 | 4  | 59 | 0  | 0.119 | HLA I T,B        |
| LHBsAg | 195 | L195S       | 60 | 2  | 59 | 0  | 0.496 | HLA I T,B        |
| LHBsAg | 198 | R198K       | 60 | 2  | 59 | 0  | 0.496 | HLA I T,B        |
| LHBsAg | 208 | S208P       | 62 | 0  | 57 | 2  | 0.236 | HLA I T,B        |
| LHBsAg | 219 | A219V/T     | 46 | 16 | 59 | 0  | 0     | B                |
| LHBsAg | 220 | P220S/T     | 46 | 16 | 59 | 0  | 0     | B                |
| LHBsAg | 221 | T221V/A     | 48 | 14 | 56 | 3  | 0.008 | B                |
| LHBsAg | 223 | P223R       | 48 | 14 | 59 | 0  | 0     | B                |
| LHBsAg | 227 | L227S       | 13 | 49 | 30 | 29 | 0.001 | B                |
| LHBsAg | 235 | S235L       | 57 | 5  | 53 | 6  | 0.759 | B                |
| LHBsAg | 236 | P236L       | 52 | 10 | 58 | 1  | 0.009 | B                |
| LHBsAg | 237 | T237I       | 60 | 2  | 59 | 0  | 0.496 | B                |
| LHBsAg | 242 | T242I       | 34 | 28 | 12 | 47 | 0     | B                |
| LHBsAg | 250 | C250Y       | 55 | 7  | 59 | 0  | 0.013 | HLA I T          |
| LHBsAg | 254 | F254L       | 59 | 3  | 59 | 0  | 0.244 | HLA I T          |
| LHBsAg | 261 | L261P       | 61 | 1  | 58 | 1  | 1     | HLA I T          |
| LHBsAg | 269 | L269W       | 60 | 2  | 59 | 0  | 0.496 | HLA I T,B        |
| LHBsAg | 272 | L272V       | 52 | 10 | 59 | 0  | 0.001 | HLA I T,B        |
| LHBsAg | 273 | D273G       | 61 | 1  | 56 | 3  | 0.356 | HLA I T,B        |
| LHBsAg | 283 | L283P       | 62 | 0  | 55 | 4  | 0.054 | B                |
| LHBsAg | 284 | L284I       | 53 | 9  | 59 | 0  | 0.003 | B                |
| LHBsAg | 287 | T287S/N/P   | 48 | 14 | 56 | 3  | 0.003 | B                |
| LHBsAg | 296 | K296R       | 48 | 14 | 59 | 0  | 0     | HLA I T,B        |
| LHBsAg | 299 | T299M       | 59 | 3  | 59 | 0  | 0.244 | HLA I/II T,B     |
| LHBsAg | 300 | I300V/T/G/S | 34 | 28 | 44 | 15 | 0.036 | HLA I/II T,B     |
| LHBsAg | 301 | G301R/N     | 48 | 14 | 59 | 0  | 0     | HLA I/II T,B     |
| LHBsAg | 303 | Q303R       | 62 | 0  | 57 | 2  | 0.236 | HLA I/II T,B     |
| LHBsAg | 307 | M307T       | 57 | 5  | 58 | 1  | 0.208 | HLA II T,B       |
| LHBsAg | 308 | F308Y       | 48 | 14 | 59 | 0  | 0     | HLA II T,B       |
| LHBsAg | 318 | D318A/V     | 53 | 9  | 59 | 0  | 0.003 | HLA I/II T,B     |
| LHBsAg | 323 | C323R       | 62 | 0  | 56 | 3  | 0.113 |                  |
| LHBsAg | 333 | A333G       | 48 | 14 | 59 | 0  | 0     | HLA I T          |
| LHBsAg | 334 | R334K       | 48 | 14 | 59 | 0  | 0     | HLA I T          |
| LHBsAg | 336 | L336Q       | 62 | 0  | 44 | 15 | 0     | HLA I T          |
| LHBsAg | 342 | V342A       | 47 | 15 | 59 | 0  | 0     | HLA I T          |
| LHBsAg | 349 | L349S       | 62 | 0  | 47 | 12 | 0     | HLA I T          |
| LHBsAg | 351 | V351A       | 62 | 0  | 56 | 3  | 0.113 | HLA I T          |
| LHBsAg | 359 | G359R       | 60 | 2  | 59 | 0  | 0.496 | HLA I T          |
| LHBsAg | 368 | A368V       | 0  | 62 | 13 | 46 | 0     |                  |
| LHBsAg | 371 | M371T       | 60 | 2  | 59 | 0  | 0.496 | HLA I T          |
| LHBsAg | 377 | P377Q       | 58 | 4  | 59 | 0  | 0.119 | HLA I T          |
| LHBsAg | 378 | S378R       | 48 | 14 | 59 | 0  | 0     | HLA I T          |



|        |     |           |    |    |    |    |       |         |
|--------|-----|-----------|----|----|----|----|-------|---------|
| LHBsAg | 381 | N381S     | 48 | 14 | 59 | 0  | 0     | HLA I T |
| LHBsAg | 382 | I382T     | 47 | 15 | 59 | 0  | 0     | HLA I T |
| LHBsAg | 384 | S384N     | 47 | 15 | 41 | 18 | 0.541 | HLA I T |
| LHBsAg | 390 | L390S     | 58 | 4  | 59 | 0  | 0.119 | HLA I T |
| LHBsAg | 398 | V398A     | 58 | 4  | 59 | 0  | 0.119 |         |
| RT     | 7   | S7A/T     | 0  | 62 | 0  | 59 | 1     |         |
| RT     | 9   | H9Y       | 49 | 13 | 42 | 17 | 0.4   | HLA I T |
| RT     | 13  | N13H      | 34 | 28 | 41 | 18 | 0.134 |         |
| RT     | 16  | I16T      | 60 | 2  | 59 | 0  | 0.496 |         |
| RT     | 18  | R18K/N    | 46 | 16 | 59 | 0  | 0     |         |
| RT     | 19  | T19A      | 60 | 2  | 59 | 0  | 0.496 |         |
| RT     | 23  | V23A      | 62 | 0  | 57 | 2  | 0.236 |         |
| RT     | 38  | T38A      | 48 | 14 | 47 | 12 | 0.827 | HLA I T |
| RT     | 42  | L42P      | 62 | 0  | 57 | 2  | 0.236 |         |
| RT     | 50  | S50P      | 60 | 2  | 59 | 0  | 0.496 | HLA I T |
| RT     | 53  | S53N      | 48 | 14 | 59 | 0  | 0     | HLA I T |
| RT     | 54  | T54I/Y    | 46 | 16 | 59 | 0  | 0     |         |
| RT     | 55  | H55R      | 48 | 14 | 56 | 3  | 0.008 |         |
| RT     | 88  | F88S      | 59 | 3  | 59 | 0  | 0.244 |         |
| RT     | 91  | I91L      | 35 | 27 | 41 | 18 | 0.188 |         |
| RT     | 106 | S106C     | 51 | 11 | 59 | 0  | 0.001 | HLA I T |
| RT     | 109 | P109S     | 48 | 14 | 41 | 18 | 0.41  | HLA I T |
| RT     | 118 | T118N     | 53 | 9  | 59 | 0  | 0.003 |         |
| RT     | 121 | N121K/I/T | 48 | 14 | 56 | 3  | 0.008 |         |
| RT     | 122 | F122I     | 14 | 48 | 13 | 46 | 0.558 |         |
| RT     | 123 | N123D     | 48 | 14 | 59 | 0  | 0     |         |
| RT     | 124 | Y124H     | 48 | 14 | 59 | 0  | 0     |         |
| RT     | 126 | H126Y     | 62 | 0  | 47 | 12 | 0     |         |
| RT     | 128 | T128A     | 62 | 0  | 41 | 18 | 0     |         |
| RT     | 129 | M129L     | 49 | 13 | 59 | 0  | 0     |         |
| RT     | 129 | M129V     | 57 | 5  | 59 | 0  | 0.058 |         |
| RT     | 131 | D131N     | 48 | 14 | 59 | 0  | 0     |         |
| RT     | 134 | D134G     | 60 | 2  | 57 | 2  | 1     |         |
| RT     | 134 | D134E     | 61 | 1  | 46 | 13 | 0     |         |
| RT     | 135 | T135S     | 0  | 62 | 12 | 47 | 0     |         |
| RT     | 138 | R138K     | 48 | 14 | 59 | 0  | 0     |         |
| RT     | 139 | N139H     | 53 | 9  | 59 | 0  | 0.003 |         |
| RT     | 145 | L145M     | 60 | 2  | 59 | 0  | 0.496 |         |
| RT     | 157 | L157S     | 62 | 0  | 56 | 3  | 0.113 | HLA I T |
| RT     | 163 | I163V     | 42 | 20 | 59 | 0  | 0     | HLA I T |
| RT     | 170 | P170S     | 59 | 3  | 59 | 0  | 0.244 |         |
| RT     | 193 | R193K     | 60 | 2  | 59 | 0  | 0.496 |         |
| RT     | 213 | S213T     | 48 | 14 | 59 | 0  | 0     | HLA I T |
| RT     | 223 | S223A     | 33 | 29 | 59 | 0  | 0     |         |
| RT     | 224 | I224V     | 46 | 16 | 59 | 0  | 0     |         |
| RT     | 253 | V253R/I   | 48 | 14 | 56 | 3  | 0.008 |         |
| RT     | 263 | E263D     | 48 | 14 | 59 | 0  | 0     |         |
| RT     | 267 | L267H/Q   | 14 | 48 | 27 | 32 | 0.008 |         |
| RT     | 269 | I269L     | 14 | 48 | 36 | 23 | 0     |         |
| RT     | 271 | P271Q     | 0  | 62 | 0  | 59 | 1     |         |
| RT     | 278 | V278I     | 48 | 14 | 41 | 18 | 0.41  |         |
| RT     | 280 | S280R     | 0  | 62 | 0  | 59 | 1     |         |
| RT     | 282 | I282V     | 48 | 14 | 59 | 0  | 0     |         |
| RT     | 283 | D283G     | 56 | 6  | 59 | 0  | 0.028 |         |
| RT     | 287 | C287R     | 62 | 0  | 56 | 3  | 0.113 |         |
| RT     | 289 | R289K     | 62 | 0  | 57 | 2  | 0.236 |         |
| RT     | 292 | C292G     | 56 | 6  | 0  | 59 | 0     |         |
| RT     | 297 | A297V     | 56 | 6  | 59 | 0  | 0.028 | HLA I T |

**Table S9 Deletion , insertion and stop codon mutations of HBV quasiespecies observed in the present study.**

| Clinical spectrum  | No. of Del , Ins or Stop codon mutations patients /total no.of patients | Patient ID (genotype) | No. of Del , Ins or Stop codon mutations /total no. of clones | Del/Insnt patterns( nt positions in fulllength HBV genome) | Del/Ins aa patterns (aa positions of related region)                                                       |
|--------------------|-------------------------------------------------------------------------|-----------------------|---------------------------------------------------------------|------------------------------------------------------------|------------------------------------------------------------------------------------------------------------|
| Experimental group | 6/6                                                                     | D10(B)                | 1/13                                                          | nt1627                                                     | Del and frameshift HBxAg at aa85 with stop codon                                                           |
|                    |                                                                         |                       | 1/13                                                          | nt3165-3189                                                | Del and frameshift LHBsAg at aa98-106 with stop codon, Del and frameshift Pol at aa278-286 with stop codon |
|                    |                                                                         |                       | 2/13                                                          | nt1896G-A                                                  | PreC/C W28*                                                                                                |
|                    |                                                                         | D15(C)                | 4/14                                                          | nt2971-2988                                                | Del LHBsAg at aa42-47, Pol at aa223-228                                                                    |
|                    |                                                                         |                       | 4/14                                                          | nt3141-3165                                                | Del LHBsAg aa66-112, Pol at aa246-292                                                                      |
|                    |                                                                         |                       | 4/14                                                          | nt41-43                                                    | LHBsAg R137*                                                                                               |
|                    |                                                                         |                       | 1/14                                                          | nt1376G-A                                                  | Pol W762*                                                                                                  |
|                    |                                                                         |                       | 1/14                                                          | nt1374                                                     | Del HBxAg start codon,                                                                                     |
|                    |                                                                         |                       | 4/14                                                          | nt1610                                                     | Pol W840*                                                                                                  |
|                    |                                                                         |                       | 1/14                                                          | nt1099-1584                                                | Del Pol at aa670-831                                                                                       |
|                    |                                                                         | D02(I)                | 11/16                                                         | nt2863-3138                                                | Del LHBsAg aa6-97, Pol aa186-277                                                                           |
|                    |                                                                         |                       | 8/16                                                          | nt503-526                                                  | Del LHBsAg aa291-298, Pol aa471-478                                                                        |
|                    |                                                                         |                       | 1/16                                                          | nt670G-A                                                   | LHBsAg W346*                                                                                               |
|                    |                                                                         |                       | 1/16                                                          | nt700G-A                                                   | LHBsAg W356*                                                                                               |
|                    |                                                                         |                       | 8/16                                                          | nt750G-A                                                   | LHBsAg W373*                                                                                               |
|                    |                                                                         |                       | 11/16                                                         | nt1896G-A                                                  | PreC/C W28*                                                                                                |
|                    |                                                                         | D23(C)                | 1/20                                                          | nt1896G-A                                                  | PreC/C W28*                                                                                                |
|                    |                                                                         | D24(C)                | 1/13                                                          | nt3077                                                     | Del and frameshift LHBsAg at aa77 with stop codon, Del and frameshift Pol at aa257 with stop codon         |
|                    |                                                                         | D07(C)                | 2/15                                                          | nt3022G-T                                                  | LHBsAg G59*                                                                                                |
|                    |                                                                         |                       | 1/15                                                          | nt79                                                       | Del and frameshift LHBsAg at aa149 with stop codon, Del and frameshift Pol at aa329 with stop codon        |
| Control group      | 5/6                                                                     | CFQ(C)                | 1/14                                                          | nt2859G-A                                                  | LHBsAg W4*                                                                                                 |
|                    |                                                                         |                       | 1/14                                                          | nt3208C-T                                                  | LHBsAg Q121*                                                                                               |
|                    |                                                                         |                       | 1/14                                                          | nt1421                                                     | Del and frameshift Pol at aa776 with stop codon, Del and frameshift HBxAg at aa16 with stop codon          |
|                    |                                                                         |                       | 1/14                                                          | nt2109                                                     | Del and frameshift PreC/C at aa 98 with stop codon                                                         |
|                    |                                                                         |                       | 2/14                                                          | nt2132-2217                                                | Del PreC/C aa107-134                                                                                       |
|                    |                                                                         |                       | 1/14                                                          | nt2102-2217                                                | Del PreC/C aa93-140                                                                                        |
|                    |                                                                         |                       | 5/14                                                          | nt1744-1763                                                | Del and frameshift HBxAg at aa 124-130 with stop codon                                                     |
|                    |                                                                         |                       | 1/14                                                          | nt1755-1776                                                | Del and frameshift HBxAg at aa 128-134 with stop codon                                                     |
|                    |                                                                         | KXY(C)                | 7/18                                                          | nt2848-2862                                                | Del LHBsAg start codon, Del Pol aa181-186                                                                  |
|                    |                                                                         |                       | 1/18                                                          | nt121                                                      | Del and frameshift LHBsAg at aa163 with stop codon, Del and frameshift Pol at aa343 with stop codon        |
|                    |                                                                         |                       | 2/18                                                          | nt2197-2212                                                | Del and frameshift PreC/C at aa128-133 with stop codon                                                     |
|                    |                                                                         |                       | 3/18                                                          | nt1647                                                     | Ins HBxAg aa93-100                                                                                         |
|                    |                                                                         |                       | 13/18                                                         | nt1755-1776                                                | Del and frameshift HBxAg at aa 128-134 with stop codon                                                     |
|                    |                                                                         |                       | 3/18                                                          | nt1751-1769                                                | Del and frameshift HBxAg at aa 126-132 with stop codon                                                     |
|                    |                                                                         | LYL(B)                | 2/12                                                          | nt121                                                      | Del and frameshift LHBsAg at aa163 with stop codon, Del and frameshift Pol at aa343 with stop codon        |
|                    |                                                                         | XDH(C)                | 1/12                                                          | nt2003                                                     | Del and frameshift PreC/C at aa64 with stop codon                                                          |
|                    |                                                                         |                       | 2/16                                                          | nt2848-2865                                                | Del LHBsAg start codon with stop codon, Del Pol aa181-186                                                  |
| 1/16               | nt302G-A                                                                |                       | Pol W404*                                                     |                                                            |                                                                                                            |

|  |  |        |      |             |                                                       |
|--|--|--------|------|-------------|-------------------------------------------------------|
|  |  | LMX(I) | 1/16 | nt1376G-A   | Pol W762*                                             |
|  |  |        | 1/16 | nt1988-2043 | Del and frameshift PreC/C at aa59-77 with stop codon  |
|  |  |        | 1/16 | nt2081-2241 | Del and frameshift PreC/C at aa90-143 with stop codon |
|  |  |        | 1/16 | nt2087-2230 | Del PreC/C aa92-139                                   |
|  |  |        | 9/16 | nt2134-2220 | Del PreC/C aa108-136                                  |
